# Supplementary material for: Long-range coupling in cyclic silanes
Source: Royal Society of Chemistry journal article supplement (doi:10.1039/d0dt03163a), 2020-01-01
Supplement: d0dt03163a1.pdf [file d0dt03163a1.pdf]

Supporting Information

**Probing Long-Range Coupling in Cyclic Silanes**

John T. Ferguson, Qifeng Jiang, Eric A. Marro, Maxime A. Siegler, Rebekka S. Klausen<sup>a,\*</sup>

<sup>a</sup>Department of Chemistry, Johns Hopkins University, 3400 N. Charles St., Baltimore, Maryland 21218, United States.

Corresponding e-mail: klausen@jhu.edu

**Table of Contents**

|    |                                      |             |
|----|--------------------------------------|-------------|
| 1. | Supplemental Figures and Tables      | <b>S-2</b>  |
| 2. | NMR Spectra                          | <b>S-15</b> |
| 3. | Single Crystal X-Ray Crystallography | <b>S-27</b> |
| 4. | References                           | <b>S-34</b> |

## 1. Supplementary Figures

**Table S-1.** Bond lengths, angles, and dihedral angles in the crystal structure of  $7^{2-} \cdot 2[K(18\text{-cr-6})]^+$

| <b>Si – Si Bond</b>                     | <b>Bond Length (Angstroms)</b> |
|-----------------------------------------|--------------------------------|
| Si1 – Si2                               | 2.35140                        |
| Si2 – Si3                               | 2.33389                        |
| Si3 – Si4                               | 2.34634                        |
| Si4 – Si5                               | 2.33861                        |
| Si5 – Si6                               | 2.32151                        |
| Si6 – Si1                               | 2.34830                        |
| Si2 – Si7                               | 2.33876                        |
| Si6 – Si8                               | 2.33067                        |
| <b>Si – Si – Si Angle</b>               | <b>Angle (Degrees)</b>         |
| Si1 – Si2 – Si3                         | 101.62740                      |
| Si2 – Si3 – Si4                         | 110.25870                      |
| Si3 – Si4 – Si5                         | 114.68332                      |
| Si4 – Si5 – Si6                         | 110.16820                      |
| Si5 – Si6 – Si1                         | 102.17405                      |
| Si6 – Si1 – Si2                         | 105.08726                      |
| Si1 – Si2 – Si7                         | 106.30995                      |
| Si7 – Si2 – Si3                         | 102.07533                      |
| Si8 – Si6 – Si1                         | 105.42806                      |
| Si5 – Si6 – Si8                         | 100.39959                      |
| <b>Si – Si – Si – Si Dihedral Angle</b> | <b>Angle (Degrees)</b>         |
| Si1 – Si2 – Si3 – Si4                   | -60.39319                      |
| Si2 – Si3 – Si4 – Si5                   | 48.37851                       |
| Si3 – Si4 – Si5 – Si6                   | -48.24828                      |
| Si4 – Si5 – Si6 – Si1                   | 60.46610                       |
| Si5 – Si6 – Si1 – Si2                   | -78.74291                      |
| Si6 – Si1 – Si2 – Si3                   | 78.42035                       |
| Si7 – Si2 – Si1 – Si6                   | -175.15549                     |
| Si7 – Si2 – Si3 – Si4                   | -170.10109                     |
| Si8 – Si6 – Si1 – Si2                   | 176.71420                      |
| Si8 – Si6 – Si5 – Si4                   | 168.90460                      |

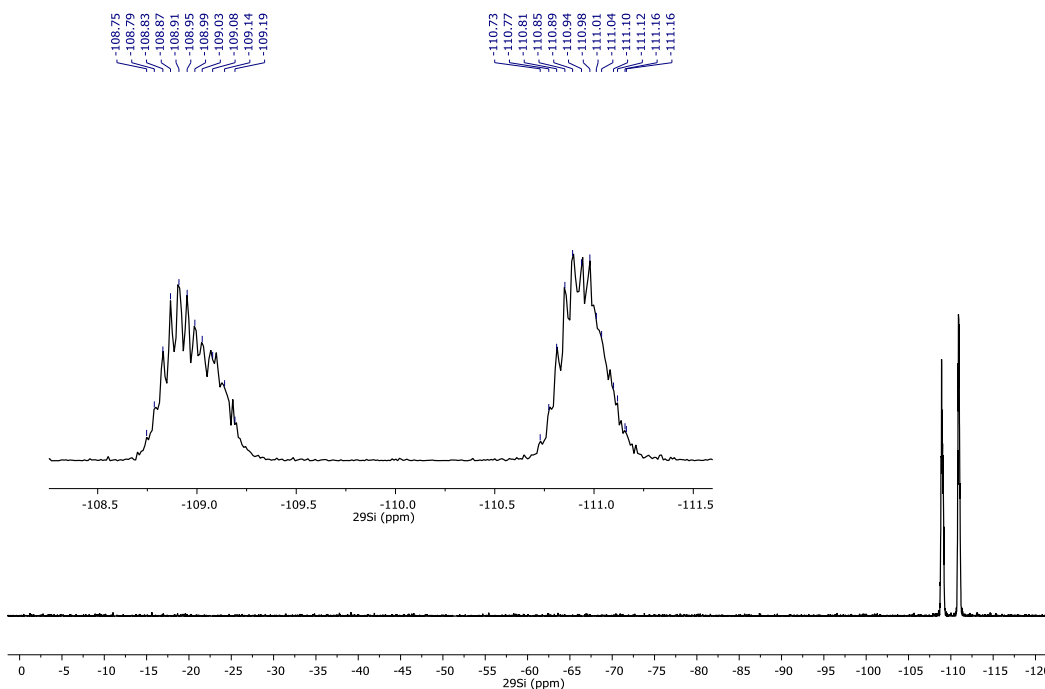

**Figure S1.**  $^{29}\text{Si}$  INEPT+ NMR spectrum (79 MHz,  $\text{C}_6\text{D}_6$ ) of **1** (55:45 *cis:trans*).  $J_X = 160$  Hz to emphasize silicon atoms with one-bond  $^1\text{H}$ - $^{29}\text{Si}$  correlations. Insets show multiplets assigned to both isomers of Si-1 overlapped.

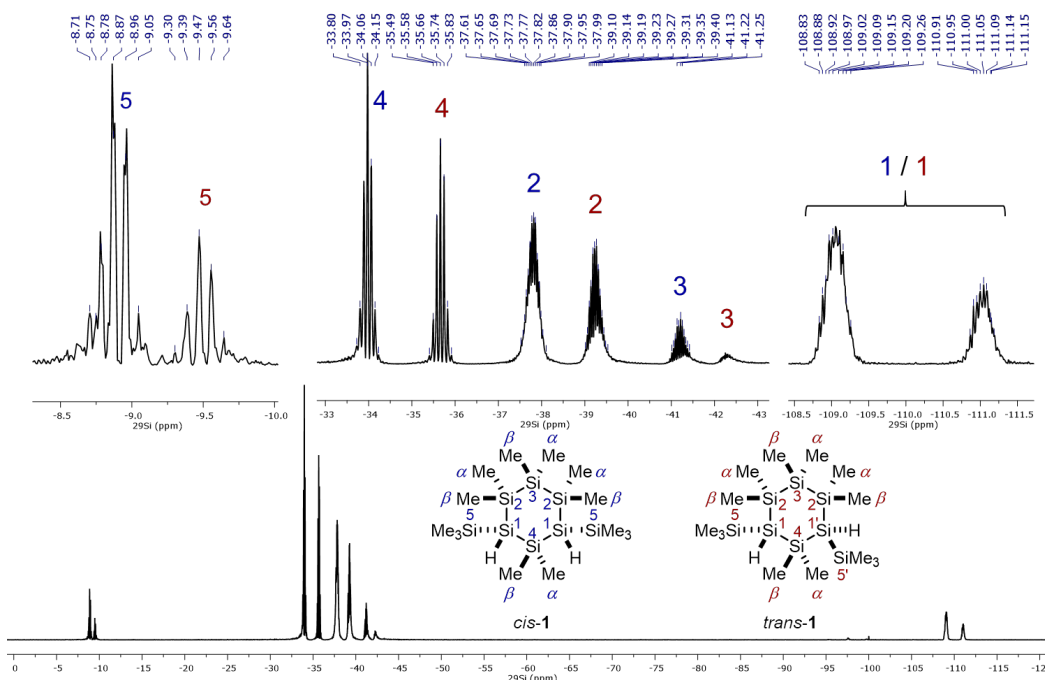

**Figure S2.**  $^{29}\text{Si}$  INEPT+ NMR spectrum (79 MHz,  $\text{C}_6\text{D}_6$ ) of **1** (55:45 *cis:trans*).  $J_X = 7$  Hz to emphasize silicon atoms with two- and three-bond  $^1\text{H}$ - $^{29}\text{Si}$  correlations. Insets show multiplets assigned to Si-4, Si-2, and Si-3. Assignments for *cis*-1 and *trans*-1 indicated in blue and red respectively.

**Table S2. 1** (55:45 *cis:trans*): Multiplet analysis and comparison of experimental and simulated  $^{29}\text{Si}$  INEPT+ spectra. Spin simulation performed in MestReNova 14.1.2.

| Cis-1          | 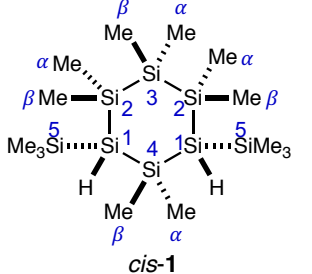 <p style="text-align: center;"><i>cis-1</i></p> |                                                                                                                                                        |                                                                                                                                                                                                                                                                                   | Experimental multiplet (black) and superimposed spin simulation (blue)                                                                                                                                                                                                                                                                                                                                                                                                                                                                                                                                                                                                                                                                                                                                                                                                                                                                                                                                                                                                                                            |
|----------------|-----------------------------------------------------------------------------------------------------------------------------------|--------------------------------------------------------------------------------------------------------------------------------------------------------|-----------------------------------------------------------------------------------------------------------------------------------------------------------------------------------------------------------------------------------------------------------------------------------|-------------------------------------------------------------------------------------------------------------------------------------------------------------------------------------------------------------------------------------------------------------------------------------------------------------------------------------------------------------------------------------------------------------------------------------------------------------------------------------------------------------------------------------------------------------------------------------------------------------------------------------------------------------------------------------------------------------------------------------------------------------------------------------------------------------------------------------------------------------------------------------------------------------------------------------------------------------------------------------------------------------------------------------------------------------------------------------------------------------------|
| Silicon #; ppm | $^1\text{J}$ (N)                                                                                                                  | $^2\text{J}$ (N)                                                                                                                                       | $^3\text{J}$ (N)                                                                                                                                                                                                                                                                  |                                                                                                                                                                                                                                                                                                                                                                                                                                                                                                                                                                                                                                                                                                                                                                                                                                                                                                                                                                                                                                                                                                                   |
| Si-1           | <b>A:</b> $^1\text{J}_{\text{Si1-H}}$ (1)                                                                                         | —                                                                                                                                                      | <b>B:</b> $^3\text{J}_{\text{Si1-Si5-C-H}}$ (9)<br><b>C:</b> $^3\text{J}_{\text{Si1-Si2-C-H}\alpha}$ (3)<br><b>D:</b> $^3\text{J}_{\text{Si1-Si2-C-H}\beta}$ (3)<br><b>E:</b> $^3\text{J}_{\text{Si1-Si4-C-H}\alpha}$ (3)<br><b>F:</b> $^3\text{J}_{\text{Si1-Si4-C-H}\beta}$ (3) |  <p style="text-align: center;">-108    -110    -112</p> <p>Experimental spectra: the doublets of multiplets for <i>cis</i>- and <i>trans</i>-1 overlap.<br/> <u>Simulation details, <i>cis</i>-1</u><br/>           (population = 1.22)<br/>           A: <math>\delta</math> -109.9 (N = 1, spin = <math>\frac{1}{2}</math>)<br/>           B: <math>\delta</math> 250 (N = 1, spin = <math>\frac{1}{2}</math>)<br/>           C: <math>\delta</math> 251 (N = 21, spin = <math>\frac{1}{2}</math>)<br/> <math>J_{\text{A-B}} = 160</math> Hz<br/> <math>J_{\text{A-C}} = 3</math> Hz<br/> <u>Simulation details, <i>trans</i>-1</u><br/>           (population = 1.00)<br/>           A2: <math>\delta</math> -110.1 (N = 1, spin = <math>\frac{1}{2}</math>)<br/>           B2: <math>\delta</math> 250 (N = 1, spin = <math>\frac{1}{2}</math>)<br/>           C2: <math>\delta</math> 251 (N = 21, spin = <math>\frac{1}{2}</math>)<br/> <math>J_{\text{A-B}} = 160</math> Hz<br/> <math>J_{\text{A-C}} = 3</math> Hz</p> |
| Si-2           | —                                                                                                                                 | <b>A:</b> $^2\text{J}_{\text{Si2-Si1-H}}$ (1)<br><b>B:</b> $^2\text{J}_{\text{Si2-C-H}\alpha}$ (3)<br><b>C:</b> $^2\text{J}_{\text{Si2-C-H}\beta}$ (3) | <b>D:</b> $^3\text{J}_{\text{Si2-Si3-C-H}\alpha}$ (3)<br><b>E:</b> $^3\text{J}_{\text{Si2-Si3-C-H}\beta}$ (3)                                                                                                                                                                     |  <p style="text-align: center;">-37.5    -38.0</p> <p>Apparent doublet of doublets of pentets (<math>J = 9.4, 6.0, 3.1</math> Hz)</p>                                                                                                                                                                                                                                                                                                                                                                                                                                                                                                                                                                                                                                                                                                                                                                                                                                                                                         |

|      |   |                                                                                                                                                                |                                                                                                                      |                                                                                                                                                                                                                                                                                                                                                                                                                                                                                                                                                                                                                                                                                                                                                       |
|------|---|----------------------------------------------------------------------------------------------------------------------------------------------------------------|----------------------------------------------------------------------------------------------------------------------|-------------------------------------------------------------------------------------------------------------------------------------------------------------------------------------------------------------------------------------------------------------------------------------------------------------------------------------------------------------------------------------------------------------------------------------------------------------------------------------------------------------------------------------------------------------------------------------------------------------------------------------------------------------------------------------------------------------------------------------------------------|
|      |   |                                                                                                                                                                |                                                                                                                      | <p><b>Simulation details</b><br/> A: <math>\delta</math> -37.82 (N = 1, spin = <math>\frac{1}{2}</math>)<br/> B: <math>\delta</math> 2 (N = 1, spin = <math>\frac{1}{2}</math>)<br/> C: <math>\delta</math> 3 (N = 3, spin = <math>\frac{1}{2}</math>)<br/> D: <math>\delta</math> 4 (N = 3, spin = <math>\frac{1}{2}</math>)<br/> E: <math>\delta</math> 5 (N = 3, spin = <math>\frac{1}{2}</math>)<br/> F: <math>\delta</math> 6 (N = 3, spin = <math>\frac{1}{2}</math>)<br/> <math>J_{A-B}</math> = 0.5 Hz<br/> <math>J_{A-C}</math> = 6 Hz<br/> <math>J_{A-D}</math> = 6 Hz<br/> <math>J_{A-E}</math> = 3 Hz<br/> <math>J_{A-F}</math> = 3 Hz<br/> quartet of quartets of doublets</p>                                                           |
| Si-3 | — | <p><b>A:</b> <math>{}^2J_{Si3-C-H\beta}</math> (3)<br/> <b>B:</b> <math>{}^2J_{Si3-C-H\alpha}</math> (3)</p>                                                   | <p><b>C:</b> <math>{}^3J_{Si2-Si3-C-H\alpha}</math> (3)<br/> <b>D:</b> <math>{}^3J_{Si2-Si3-C-H\beta}</math> (3)</p> | 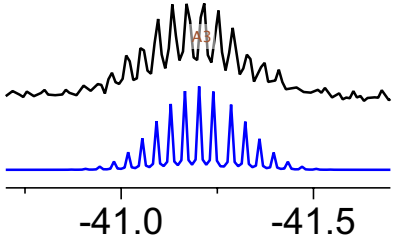 <p>Apparent doublet of doublets of quartets (J = 9.0, 6.1, 3.0 Hz)<br/> <b>Simulation details</b><br/> A: <math>\delta</math> -41.21 (N = 1, spin = <math>\frac{1}{2}</math>)<br/> B: <math>\delta</math> 2 (N = 3, spin = <math>\frac{1}{2}</math>)<br/> C: <math>\delta</math> 3 (N = 3, spin = <math>\frac{1}{2}</math>)<br/> D: <math>\delta</math> 4 (N = 3, spin = <math>\frac{1}{2}</math>)<br/> E: <math>\delta</math> 5 (N = 3, spin = <math>\frac{1}{2}</math>)<br/> <math>J_{A-B}</math> = 6 Hz<br/> <math>J_{A-C}</math> = 6 Hz<br/> <math>J_{A-D}</math> = 3 Hz<br/> <math>J_{A-E}</math> = 3 Hz<br/> quartet of quartets of quartets of quartets</p> |
| Si-4 | — | <p><b>A:</b> <math>{}^2J_{Si4-Si1-H}</math> (1)<br/> <b>B:</b> <math>{}^2J_{Si4-C-H\alpha}</math> (3)<br/> <b>C:</b> <math>{}^2J_{Si4-C-H\beta}</math> (3)</p> | —                                                                                                                    |  <p>Apparent heptet (J = 6.6 Hz)<br/> <b>Simulation details</b><br/> A: <math>\delta</math> -33.97<br/> B: <math>\delta</math> 2<br/> C: <math>\delta</math> 3<br/> D: <math>\delta</math> 4<br/> <math>J_{A-B}</math> = 0.4 Hz (1)<br/> <math>J_{A-C}</math> = 6 Hz (3)</p>                                                                                                                                                                                                                                                                                                                                                                                      |

|         |                                                                                                                                      |                                                                                |                                                                                                                                                                                         |                                                                                                                                                                                                                                                                                                                                                                                                                                                                                                                                                                                                                                                                                                                                                                                                                                                                                                                            |
|---------|--------------------------------------------------------------------------------------------------------------------------------------|--------------------------------------------------------------------------------|-----------------------------------------------------------------------------------------------------------------------------------------------------------------------------------------|----------------------------------------------------------------------------------------------------------------------------------------------------------------------------------------------------------------------------------------------------------------------------------------------------------------------------------------------------------------------------------------------------------------------------------------------------------------------------------------------------------------------------------------------------------------------------------------------------------------------------------------------------------------------------------------------------------------------------------------------------------------------------------------------------------------------------------------------------------------------------------------------------------------------------|
|         |                                                                                                                                      |                                                                                |                                                                                                                                                                                         | $J_{A-D} = 6 \text{ Hz (3)}$<br>quartet of quartets of doublets                                                                                                                                                                                                                                                                                                                                                                                                                                                                                                                                                                                                                                                                                                                                                                                                                                                            |
| Si-5    | —                                                                                                                                    | <b>A:</b> $^2J_{\text{Si5-Si1-H}} (1)$<br><b>B:</b> $^2J_{\text{Si5-C-H}} (9)$ | —                                                                                                                                                                                       | 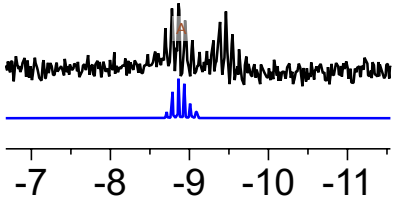 <p>Simulation details</p> <p>A: <math>\delta -8.9</math> (N = 1, spin = <math>\frac{1}{2}</math>)<br/>           B: <math>\delta 250</math> (N = 1, spin = <math>\frac{1}{2}</math>)<br/>           C: <math>\delta 251</math> (N = 9, spin = <math>\frac{1}{2}</math>)<br/> <math>J_{A-B} = 0.4 \text{ Hz}</math><br/> <math>J_{A-C} = 6 \text{ Hz}</math><br/>           Decet of doublets</p>                                                                                                                                                                                                                                                                                                                                                                                                                                        |
| Trans-1 |  <p style="text-align: center;"><i>trans-1</i></p> |                                                                                |                                                                                                                                                                                         |                                                                                                                                                                                                                                                                                                                                                                                                                                                                                                                                                                                                                                                                                                                                                                                                                                                                                                                            |
| Si-1    | <b>A:</b> $^1J_{\text{Si1-H}} (1)$                                                                                                   | —                                                                              | <b>B:</b> $^3J_{\text{Si1-Si5-C-H}} (9)$<br><b>C:</b> $^3J_{\text{Si1-Si2-C-H}\alpha} (3)$<br><b>D:</b> $^3J_{\text{Si1-Si2-C-H}\beta} (3)$<br><b>E:</b> $^3J_{\text{Si1-Si4-C-H}} (6)$ |  <p>Experimental spectra: the doublets of multiplets for cis- and trans-1 overlap.</p> <p>Simulation details, cis-1 (weighted 1.22)</p> <p>A: <math>\delta -109.9</math> (N = 1, spin = <math>\frac{1}{2}</math>)<br/>           B: <math>\delta 250</math> (N = 1, spin = <math>\frac{1}{2}</math>)<br/>           C: <math>\delta 251</math> (N = 21, spin = <math>\frac{1}{2}</math>)<br/> <math>J_{A-B} = 160 \text{ Hz}</math><br/> <math>J_{A-C} = 3 \text{ Hz}</math></p> <p>Simulation details, trans-1 (weighted 1.00)</p> <p>A2: <math>\delta -110.1</math> (N = 1, spin = <math>\frac{1}{2}</math>)<br/>           B2: <math>\delta 250</math> (N = 1, spin = <math>\frac{1}{2}</math>)<br/>           C2: <math>\delta 251</math> (N = 21, spin = <math>\frac{1}{2}</math>)<br/> <math>J_{A-B} = 160 \text{ Hz}</math></p> |

|                |   |                                                                                                                                                               |                                                                                                                             |                                                                                                                                                                                                                                                                                                                                                                                                                                                                                                                                                                                                                                                                                                                                                                                                                                                                                                                                   |
|----------------|---|---------------------------------------------------------------------------------------------------------------------------------------------------------------|-----------------------------------------------------------------------------------------------------------------------------|-----------------------------------------------------------------------------------------------------------------------------------------------------------------------------------------------------------------------------------------------------------------------------------------------------------------------------------------------------------------------------------------------------------------------------------------------------------------------------------------------------------------------------------------------------------------------------------------------------------------------------------------------------------------------------------------------------------------------------------------------------------------------------------------------------------------------------------------------------------------------------------------------------------------------------------|
| Si-2,<br>Si-2' | — | <b>A:</b> $^2J_{\text{Si}2\text{-C-H}\alpha}$ (3)<br><b>B:</b> $^2J_{\text{Si}2\text{-C-H}\beta}$ (3)<br><b>C:</b> $^2J_{\text{Si}2\text{-Si}1\text{-H}}$ (1) | <b>D:</b> $^3J_{\text{Si}2\text{-Si}3\text{-C-H}}$ (6)                                                                      | $J_{\text{A-C}} = 3 \text{ Hz}$<br>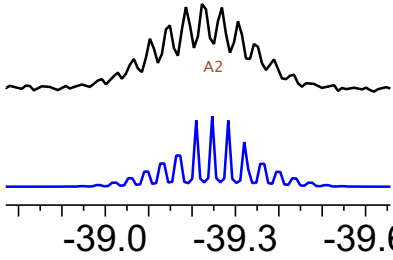 <p>Apparent doublet of doublets of heptets (<math>J = 10.0, 7.0, 3.0</math>)<br/> <u>Simulation details</u><br/> A: <math>\delta -39.25</math> (<math>N = 1</math>, spin = <math>\frac{1}{2}</math>)<br/> B: <math>\delta 2</math> (<math>N = 1</math>, spin = <math>\frac{1}{2}</math>)<br/> C: <math>\delta 3</math> (<math>N = 3</math>, spin = <math>\frac{1}{2}</math>)<br/> D: <math>\delta 4</math> (<math>N = 3</math>, spin = <math>\frac{1}{2}</math>)<br/> E: <math>\delta 5</math> (<math>N = 6</math>, spin = <math>\frac{1}{2}</math>)<br/> <math>J_{\text{A-B}} = 0.5 \text{ Hz}</math><br/> <math>J_{\text{A-C}} = 6 \text{ Hz}</math><br/> <math>J_{\text{A-D}} = 6 \text{ Hz}</math><br/> <math>J_{\text{A-E}} = 3 \text{ Hz}</math><br/> Quartet of quartets of heptets of doublets </p> |
| Si-3           | — | <b>A:</b> $^2J_{\text{Si}3\text{-C-H}}$ (6)                                                                                                                   | <b>B:</b> $^3J_{\text{Si}3\text{-Si}2\text{-C-H}\alpha}$ (3)<br><b>C:</b> $^3J_{\text{Si}3\text{-Si}2\text{-C-H}\beta}$ (3) |  <p>Apparent broad singlet<br/> Simulation<br/> <u>Simulation details</u><br/> A: <math>\delta -42.24</math> (<math>N = 1</math>, spin = <math>\frac{1}{2}</math>)<br/> B: <math>\delta 2</math> (<math>N = 6</math>, spin = <math>\frac{1}{2}</math>)<br/> C: <math>\delta 3</math> (<math>N = 3</math>, spin = <math>\frac{1}{2}</math>)<br/> D: <math>\delta 4</math> (<math>N = 3</math>, spin = <math>\frac{1}{2}</math>)<br/> <math>J_{\text{A-B}} = 6 \text{ Hz}</math><br/> <math>J_{\text{A-C}} = 6 \text{ Hz}</math><br/> <math>J_{\text{A-E}} = 3 \text{ Hz}</math><br/> Heptet of quartets of quartets </p>                                                                                                                                                                                                                        |
| Si-4           | — | <b>A:</b> $^2J_{\text{Si}4\text{-Si}1\text{-H}}$ (1)<br><b>B:</b> $^2J_{\text{Si}4\text{-C-H}}$ (6)                                                           | —                                                                                                                           |  <p>Apparent heptet (<math>J = 6.5 \text{ Hz}</math>)</p>                                                                                                                                                                                                                                                                                                                                                                                                                                                                                                                                                                                                                                                                                                                                                                                     |

|                |   |                                                                                                     |   |                                                                                                                                                                                                                                                                                                                                                                                                                                                                    |
|----------------|---|-----------------------------------------------------------------------------------------------------|---|--------------------------------------------------------------------------------------------------------------------------------------------------------------------------------------------------------------------------------------------------------------------------------------------------------------------------------------------------------------------------------------------------------------------------------------------------------------------|
|                |   |                                                                                                     |   | <p><b>Simulation details</b><br/> A: <math>\delta</math> -35.6 (N = 1, spin = <math>\frac{1}{2}</math>)<br/> B: <math>\delta</math> 2 (N = 1, spin = <math>\frac{1}{2}</math>)<br/> C: <math>\delta</math> 3 (N = 6, spin = <math>\frac{1}{2}</math>)<br/> <math>J_{A-B}</math> = 0.5 Hz<br/> <math>J_{A-C}</math> = 6 Hz<br/> Heptet of doublets</p>                                                                                                              |
| Si-5,<br>Si-5' | — | <p><b>A:</b> <math>{}^2J_{Si5-Si1-H}</math> (1)<br/> <b>B:</b> <math>{}^2J_{Si5-C-H}</math> (9)</p> | — | 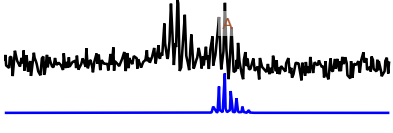 <p>-7 -8 -9 -10 -11</p> <p><b>Simulation details</b><br/> A: <math>\delta</math> -9.5 (N = 1, spin = <math>\frac{1}{2}</math>)<br/> B: <math>\delta</math> 250 (N = 1, spin = <math>\frac{1}{2}</math>)<br/> C: <math>\delta</math> 251 (N = 9, spin = <math>\frac{1}{2}</math>)<br/> <math>J_{A-B}</math> = 0.4 Hz<br/> <math>J_{A-C}</math> = 6 Hz<br/> Decet of doublets</p> |

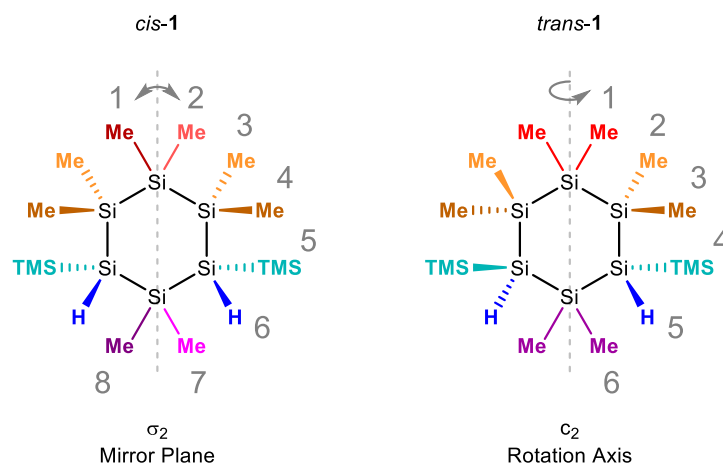

**Figure S3.** Symmetry elements in *cis-1* and *trans-1*. The  $\sigma_v$  mirror plane of *cis-1* gives it  $C_s$  symmetry, whereas *trans-1* is  $C_2$  symmetric. The different symmetry elements result in a different number of chemically inequivalent groups and expected number of  ${}^1H$  NMR peaks.



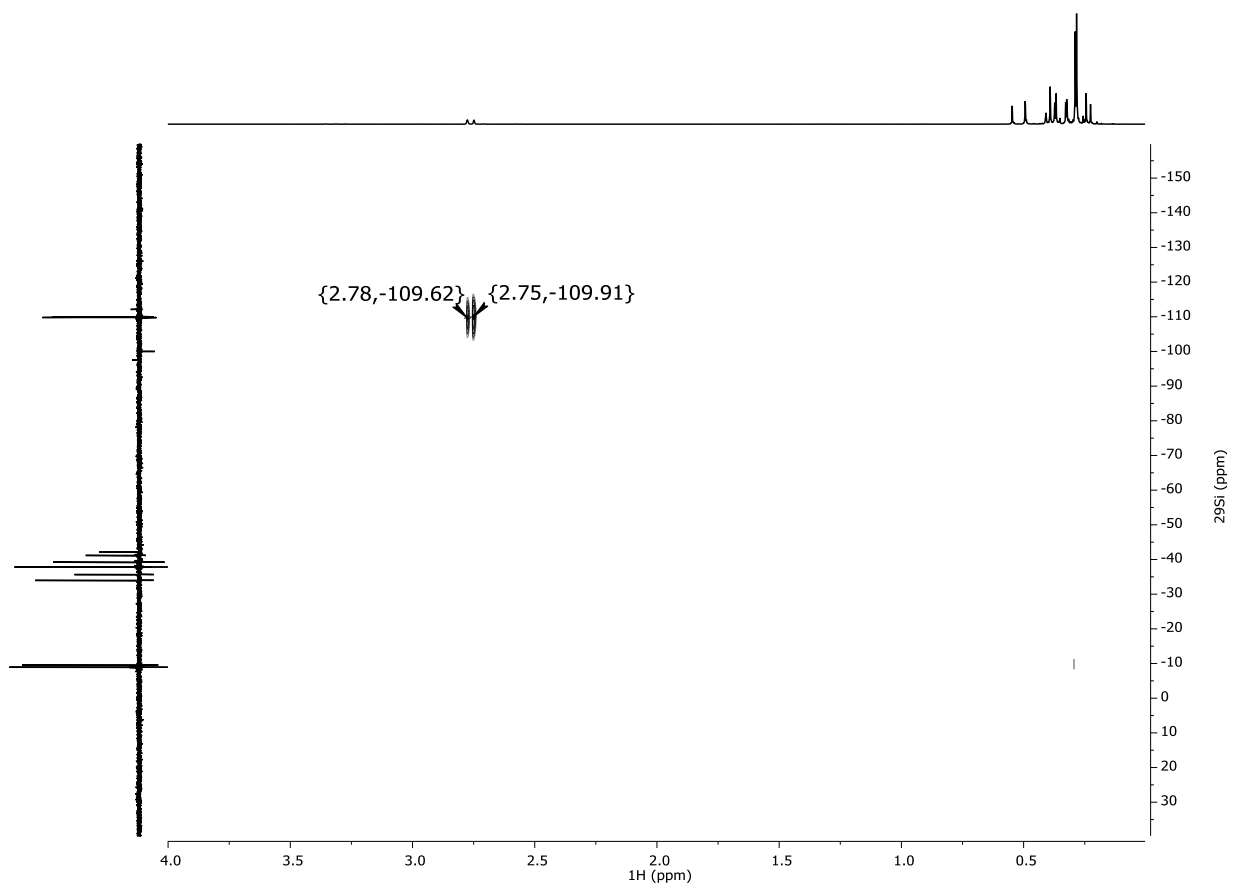

**Figure S-4.**  $^1\text{H}$ - $^{29}\text{Si}$  HSQC (400 MHz,  $\text{C}_6\text{D}_6$ ) spectrum of **1** (55:45 *cis:trans*).  $J_x = 120$  Hz (shows one-bond correlations).

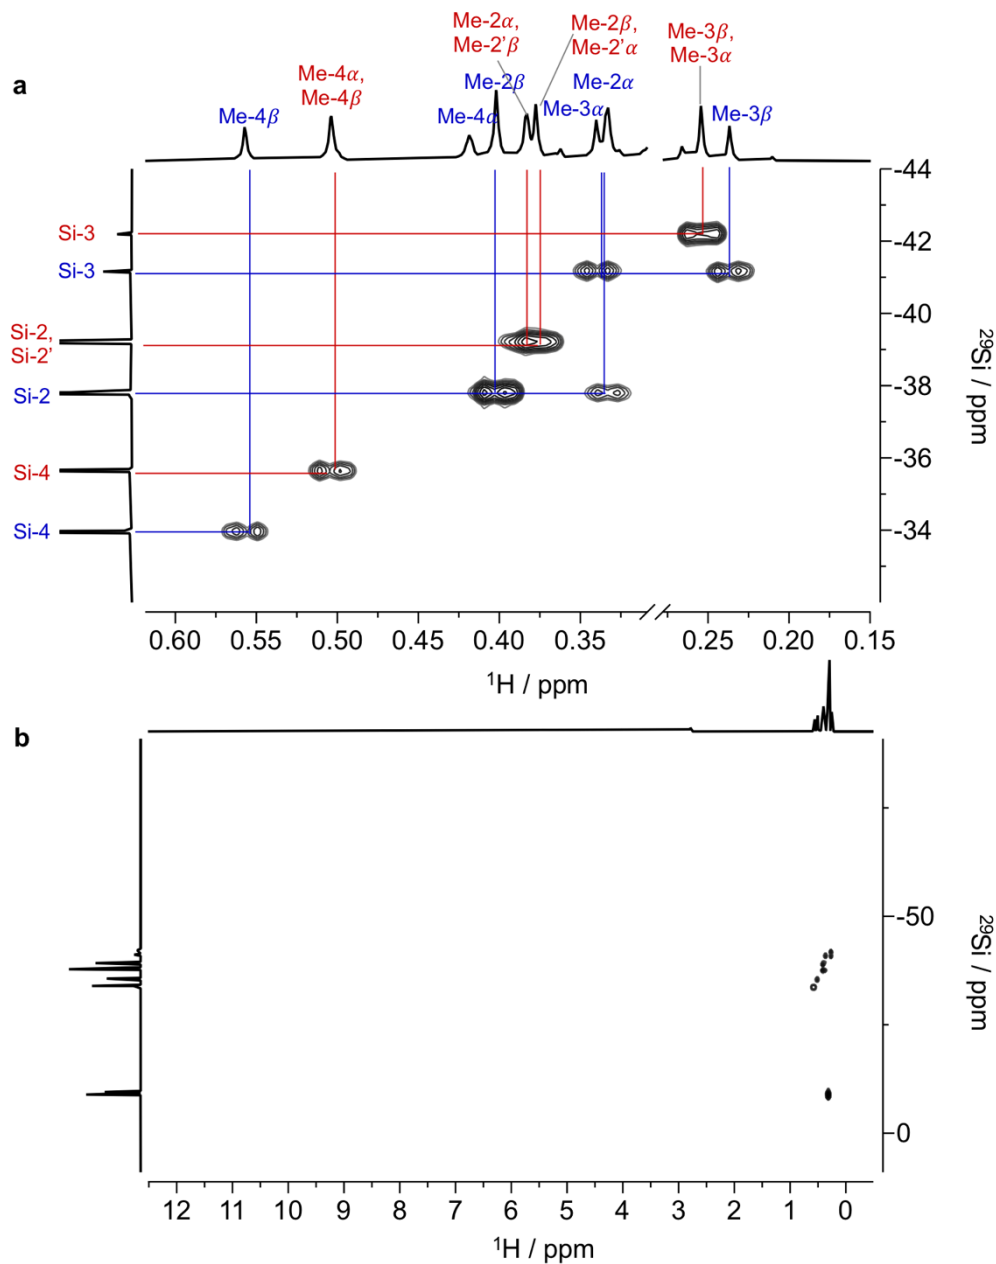

**Figure S-5.** a) Cropped  $^1\text{H}$ - $^{29}\text{Si}$  HMBC (400 MHz,  $\text{C}_6\text{D}_6$ ,  $J_x = 3$  Hz) spectrum of **1** (55:45 cis:trans) highlighting two-bond correlations between Si-2, Si-3, Si-4 and their corresponding methyl groups. Cross-peak between Me-4 $\alpha$  and Si-4 is missing, but appears at other values of  $J_x$  (see Figures S-6, S-7). b) Full  $^1\text{H}$ - $^{29}\text{Si}$  HMBC (400 MHz,  $\text{C}_6\text{D}_6$ ,  $J_x = 3$  Hz) spectrum of **1** (55:45 cis:trans).

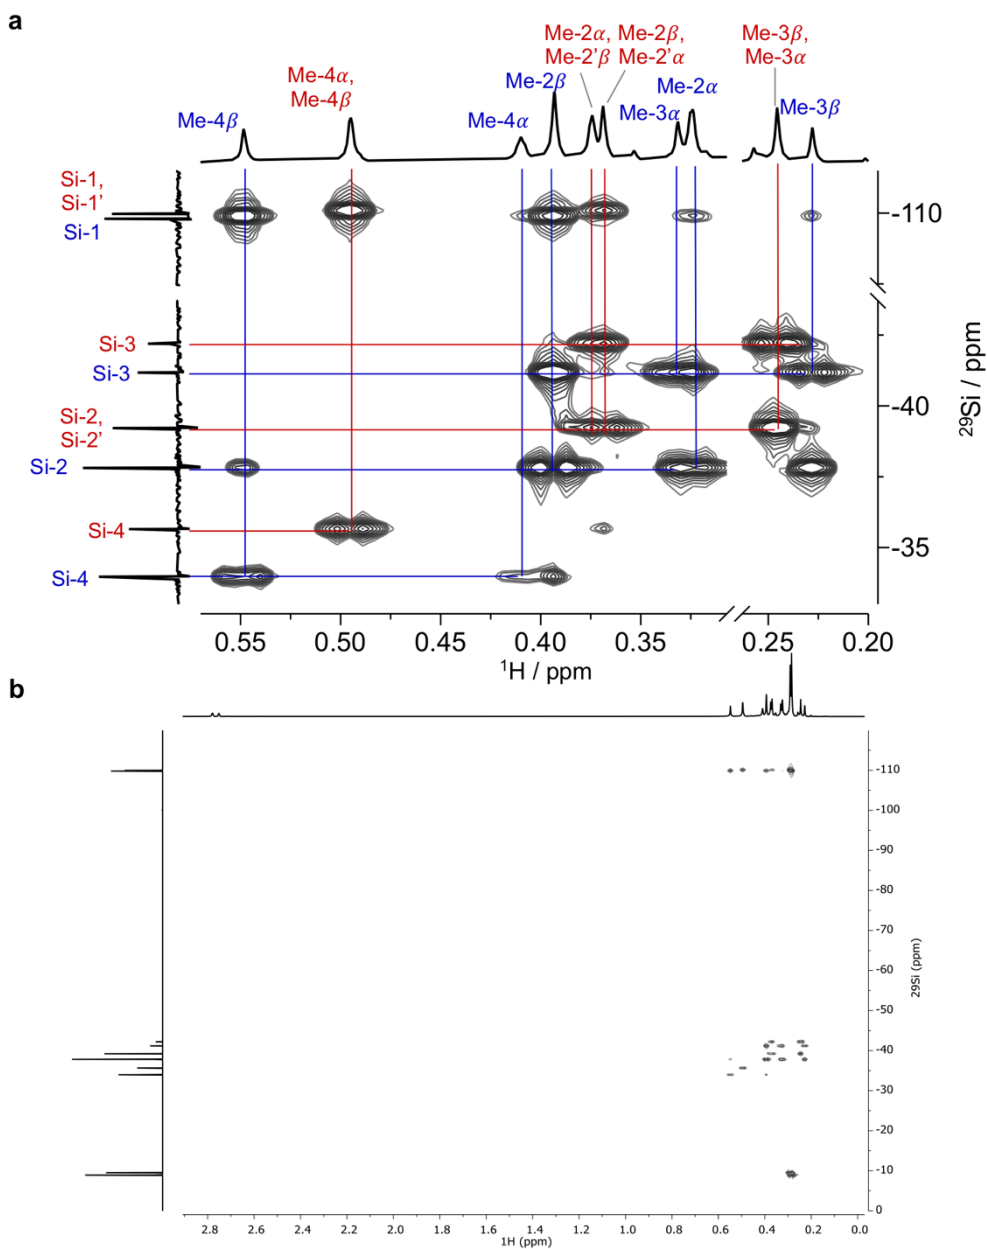

**Figure S-6.** a) Cropped  $^1\text{H}$ - $^{29}\text{Si}$  HMBC (400 MHz,  $\text{C}_6\text{D}_6$ ,  $J_X = 10$  Hz) spectrum of **1** (55:45 cis:trans) highlighting two- and three-bond correlations between Si-2, Si-3, Si-4 and their corresponding methyl groups. b) Full  $^1\text{H}$ - $^{29}\text{Si}$  HMBC (400 MHz,  $\text{C}_6\text{D}_6$ ,  $J_X = 10$  Hz) spectrum of **1** (55:45 cis:trans).

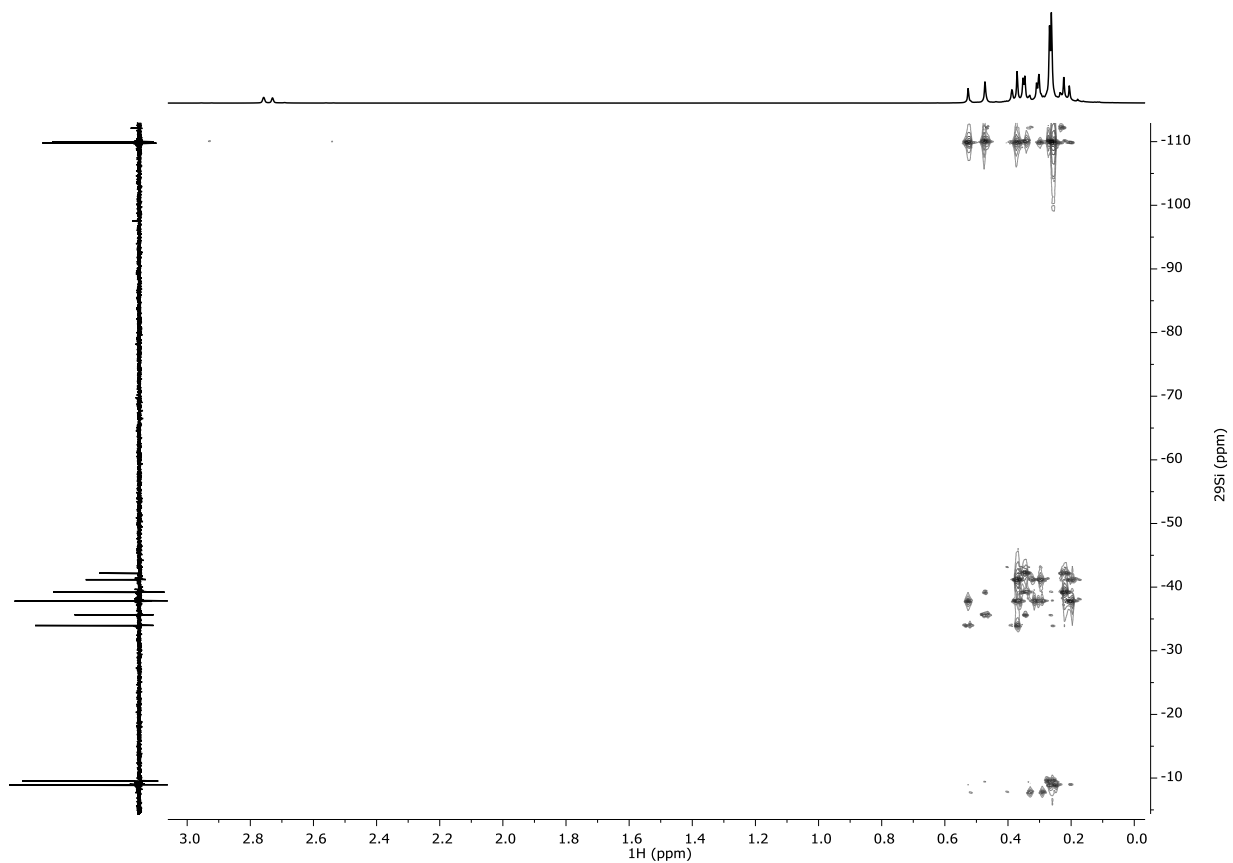

**Figure S-7.** Full  $^1\text{H}$ - $^{29}\text{Si}$  HMBC (400 MHz,  $\text{C}_6\text{D}_6$ ,  $J_x = 7$  Hz) spectrum of **1** (55:45 cis:trans) highlighting two- and three-bond correlations. See Figure 6 in the manuscript for cropped spectrum.

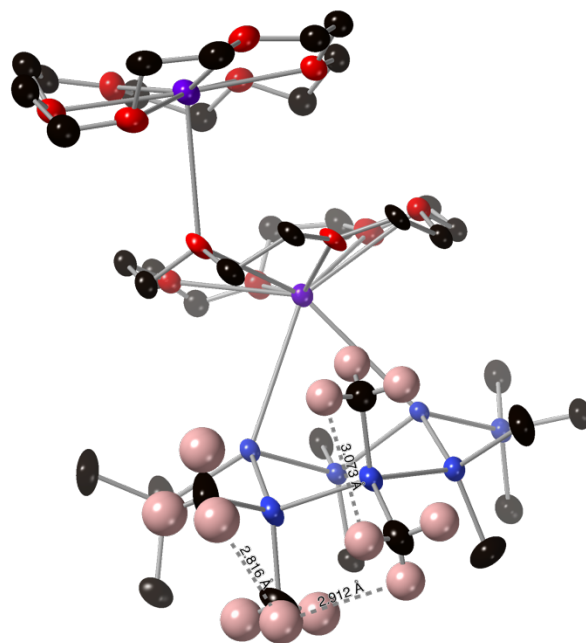

**Figure S-8.** Interproton distances in  $7^{2-} \cdot 2[\text{K}(18\text{-cr-6})]^+$ . Similar interproton distances were observed between protons on methyl groups attached to the same or adjacent silicon atoms. Most hydrogens omitted for clarity. Blue = silicon; black = carbon; red = oxygen; pink = hydrogen; purple = potassium.

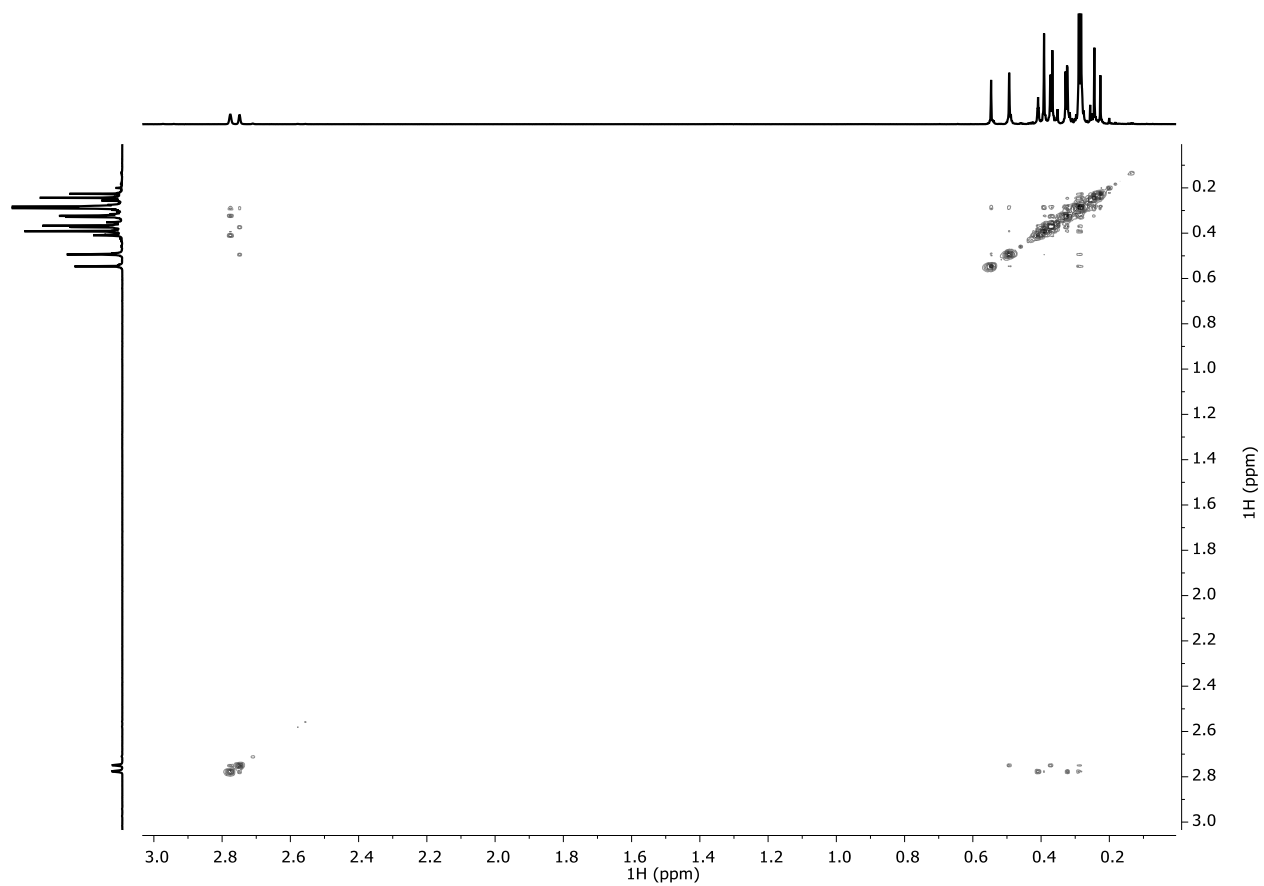

**Figure S-9.** Full <sup>1</sup>H-<sup>1</sup>H gCOSY (400 MHz, C<sub>6</sub>D<sub>6</sub>) spectrum of **1** (55:45 *cis:trans*).

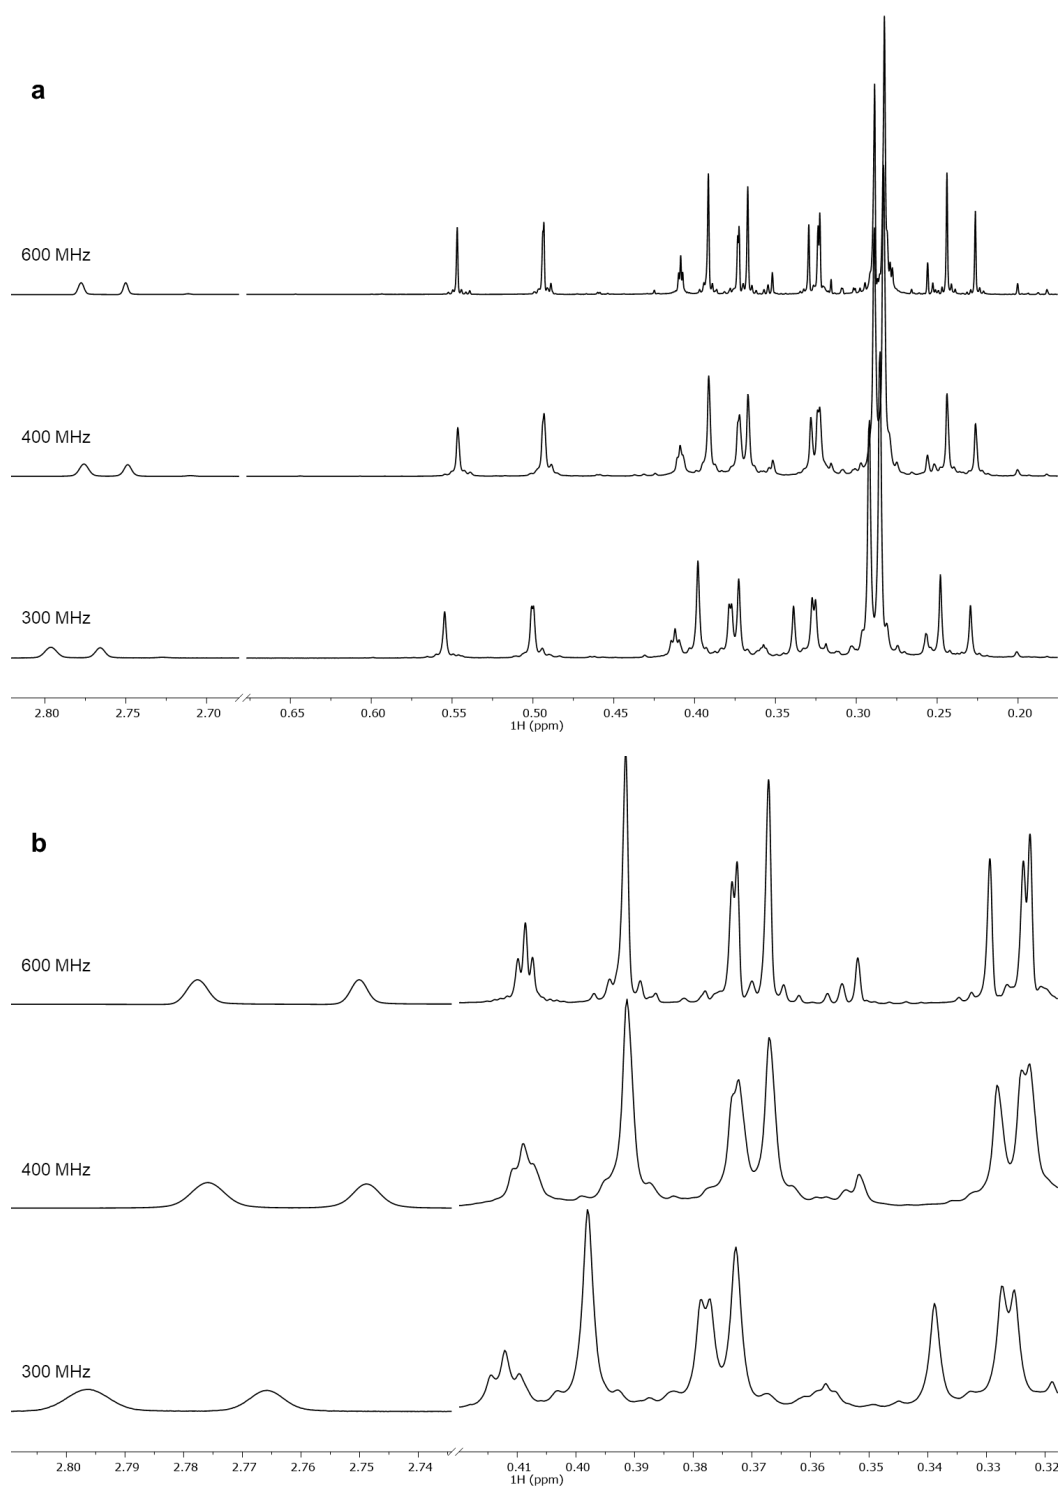

**Figure S-10.**  $^1\text{H}$  NMR spectra of 55:45 *cis:trans* **1** collected on spectrometers of different field strength shown to distinguish coupling constants from chemical shift differences in overlapping peaks.

## 2. NMR Spectra

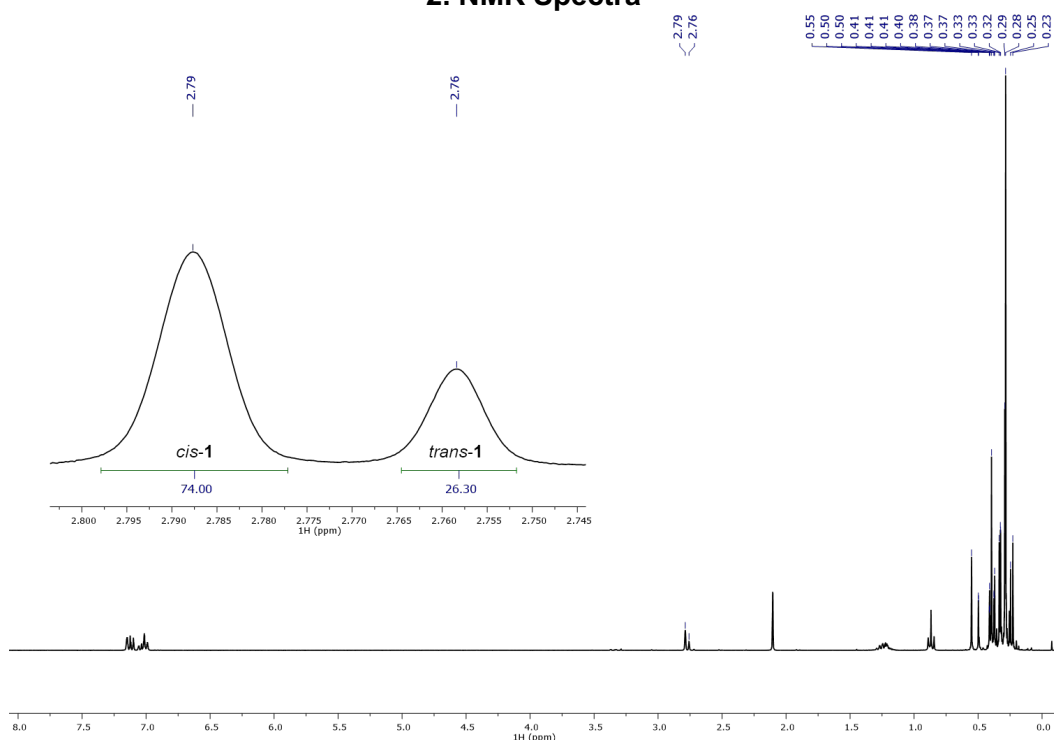

**Figure S-11.**  $^1\text{H}$  NMR (400 MHz,  $\text{C}_6\text{D}_6$ ) spectrum of **1** (74:26 *cis:trans*) including inset with integrals to show relative abundance of isomers.

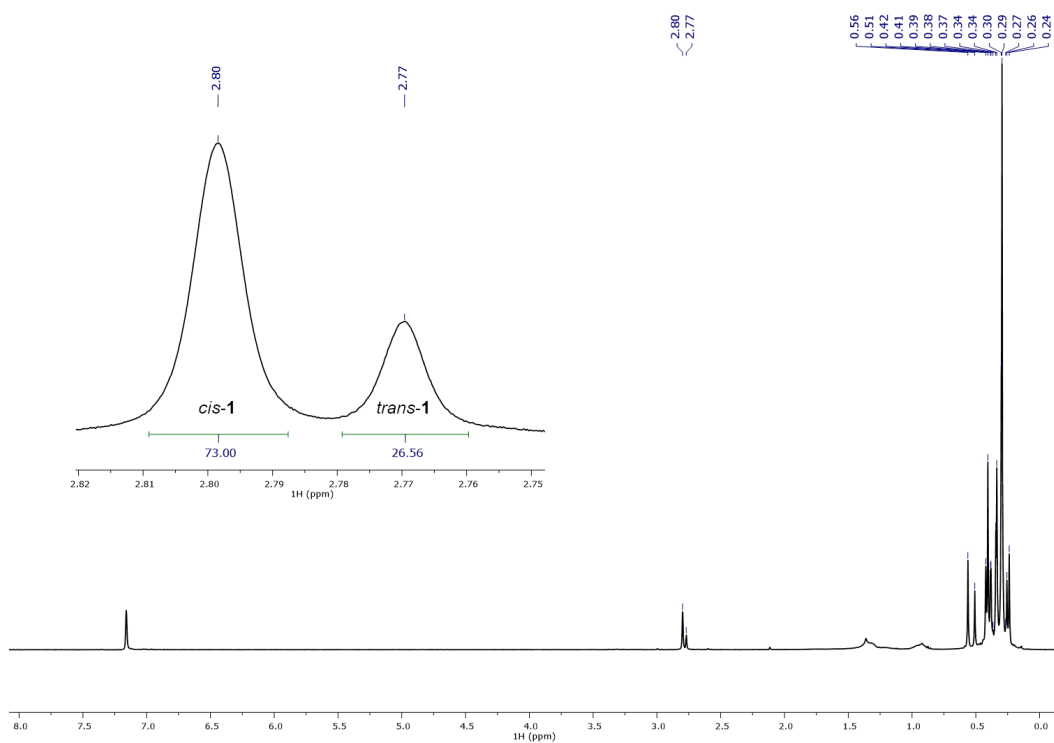

**Figure S-12.**  $^1\text{H}$  NMR (400 MHz,  $\text{C}_6\text{D}_6$ ) spectrum of **1** (73:27 *cis:trans*) including inset with integrals to show relative abundance of isomers.



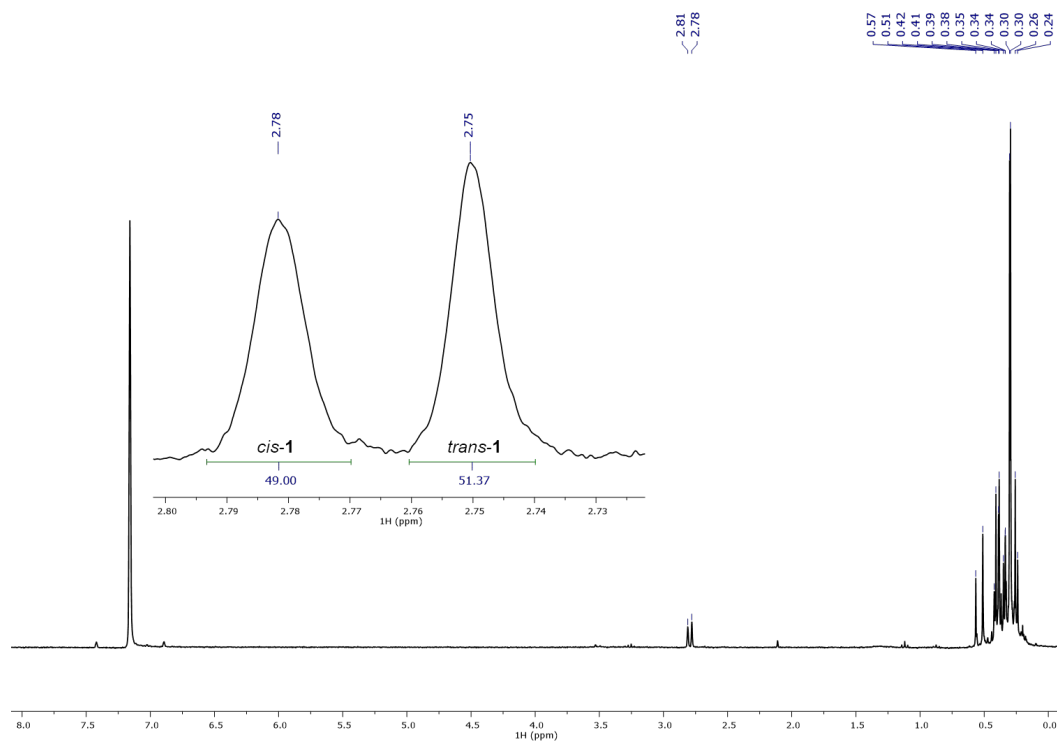

**Figure S-13.**  $^1\text{H}$  NMR (400 MHz,  $\text{C}_6\text{D}_6$ ) spectrum of **1** (49:51 *cis:trans*) including inset with integrals to show relative abundance of isomers.

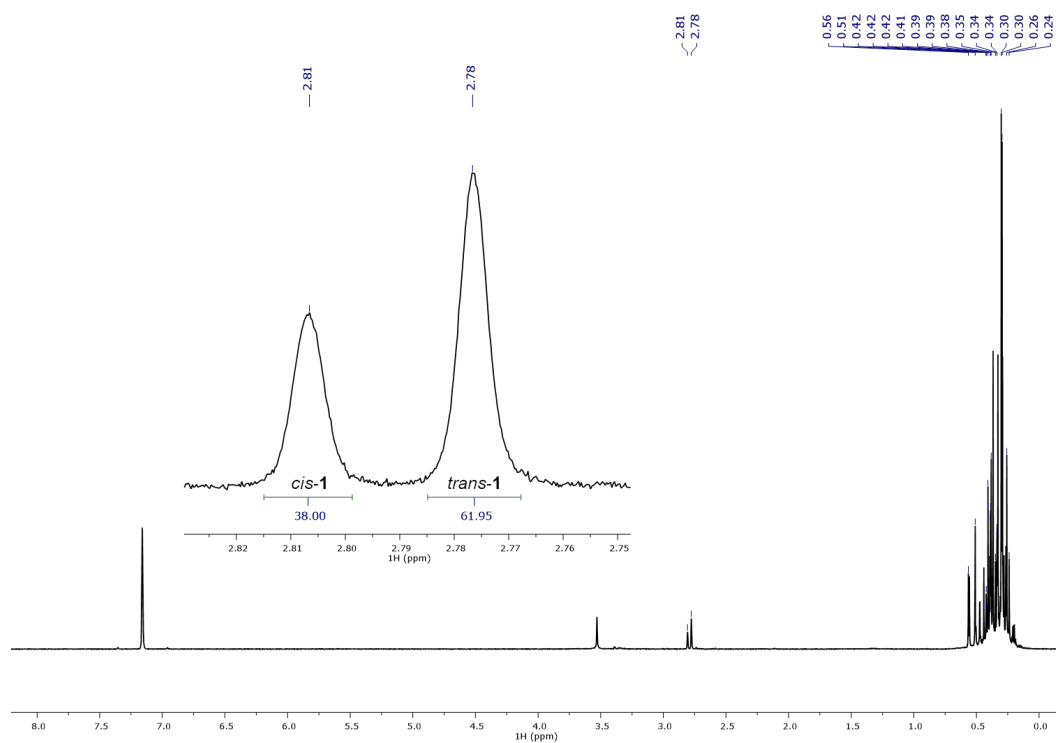

**Figure S-14.**  $^1\text{H}$  NMR (400 MHz,  $\text{C}_6\text{D}_6$ ) spectrum of **1** (38:62 *cis:trans*) including inset with integrals to show relative abundance of isomers.

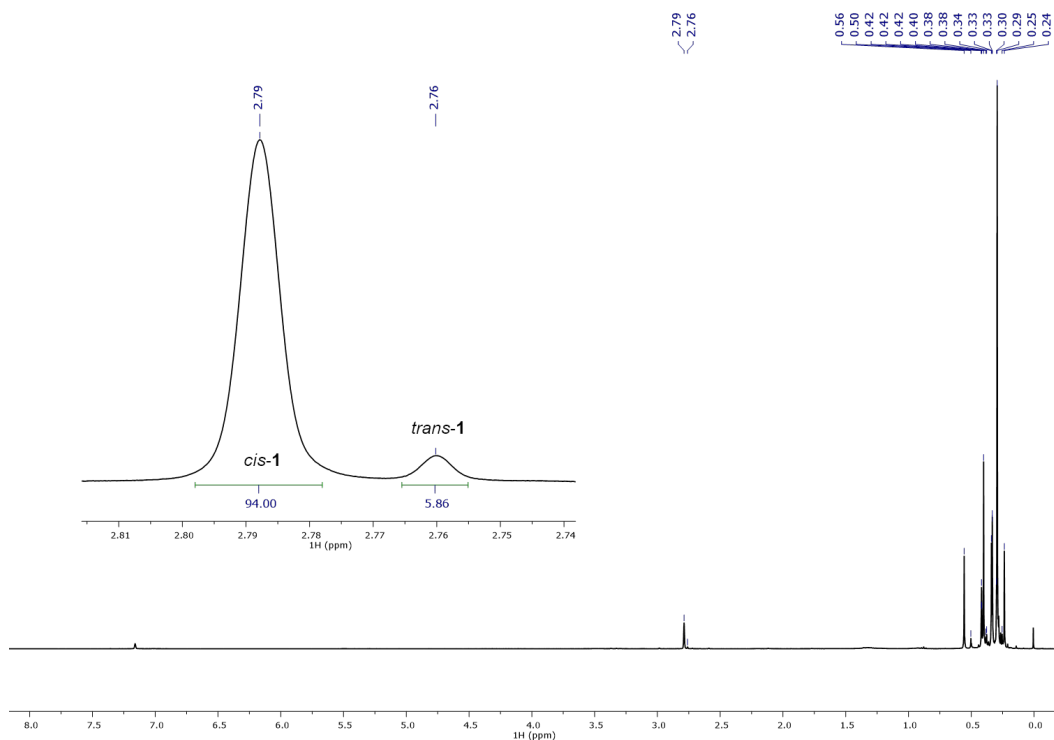

**Figure S-15.**  $^1\text{H}$  NMR (400 MHz,  $\text{C}_6\text{D}_6$ ) spectrum of **1** (94:6 *cis:trans*) including inset with integrals to show relative abundance of isomers.

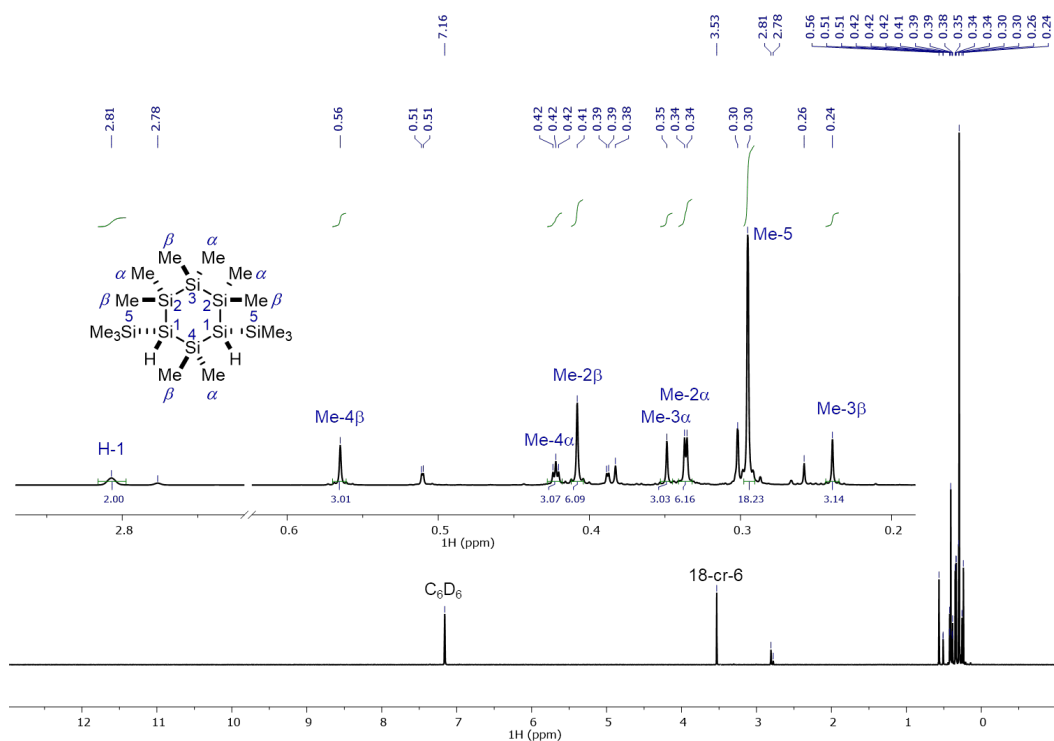

**Figure S-16.**  $^1\text{H}$  NMR (400 MHz,  $\text{C}_6\text{D}_6$ ) spectrum of **1** (83:17 *cis:trans*) with assignments shown for *cis*-**1**.

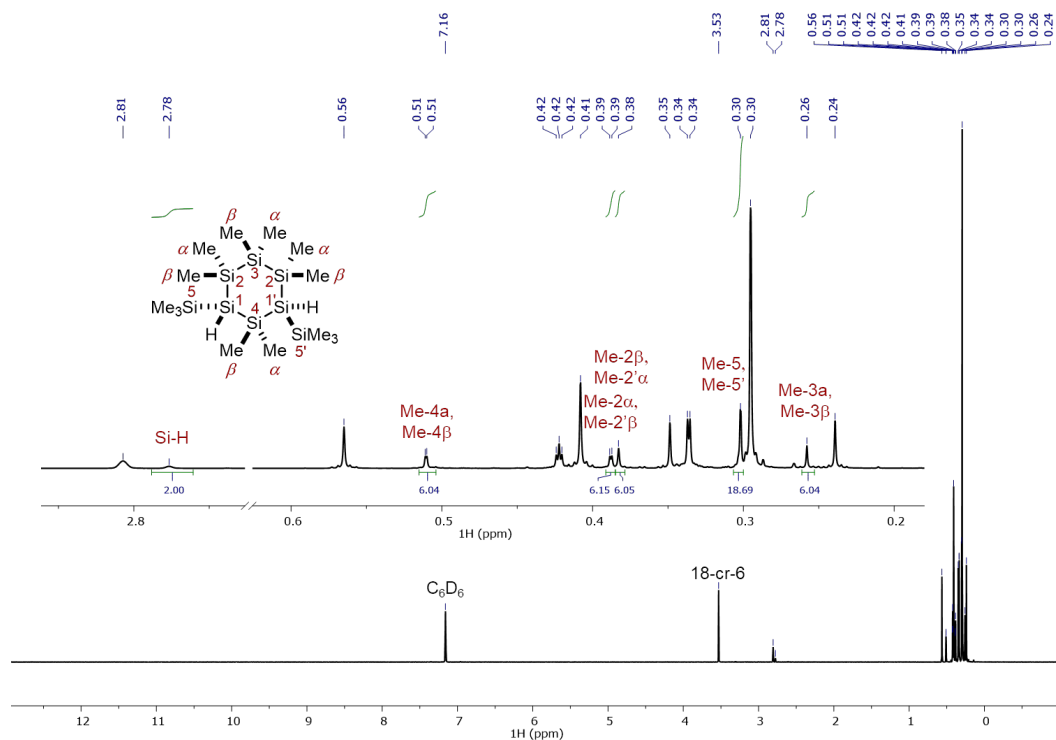

**Figure S-17.**  $^1\text{H}$  NMR (400 MHz,  $\text{C}_6\text{D}_6$ ) spectrum of **1** (83:17 *cis:trans*) with assignments shown for *trans-1*.

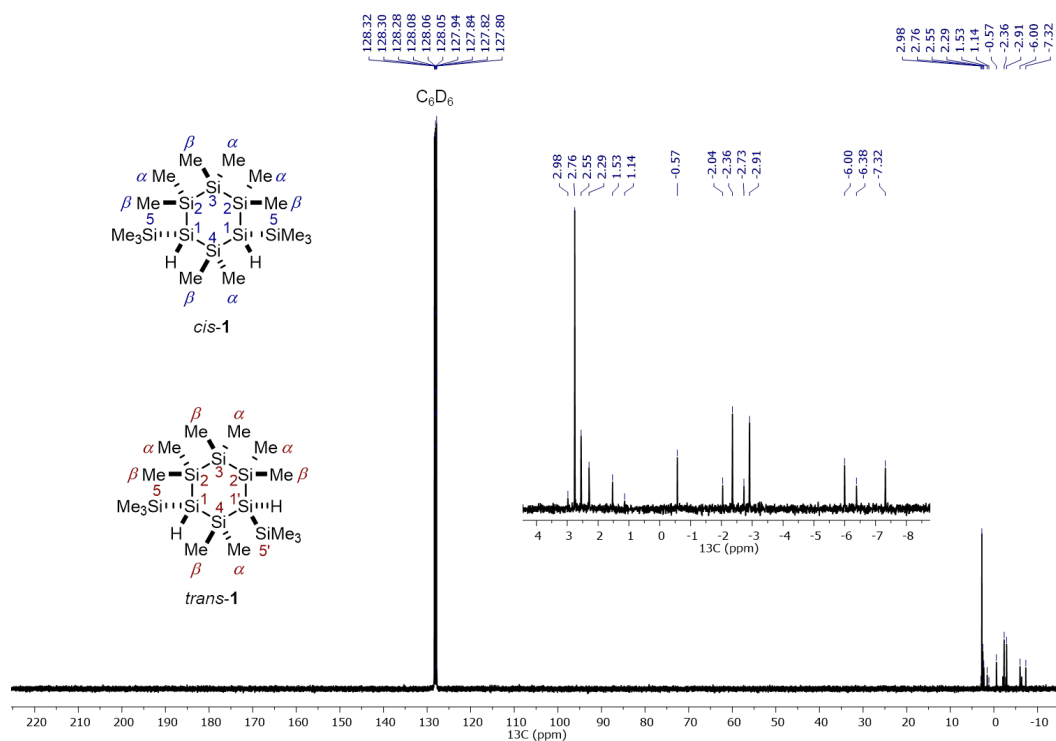

**Figure S-18.**  $^{13}\text{C}$   $\{^1\text{H}\}$  NMR spectrum (101 MHz,  $\text{C}_6\text{D}_6$ ) of (83:17 *cis:trans*) **1**. Inset shows methyl region for clarity.

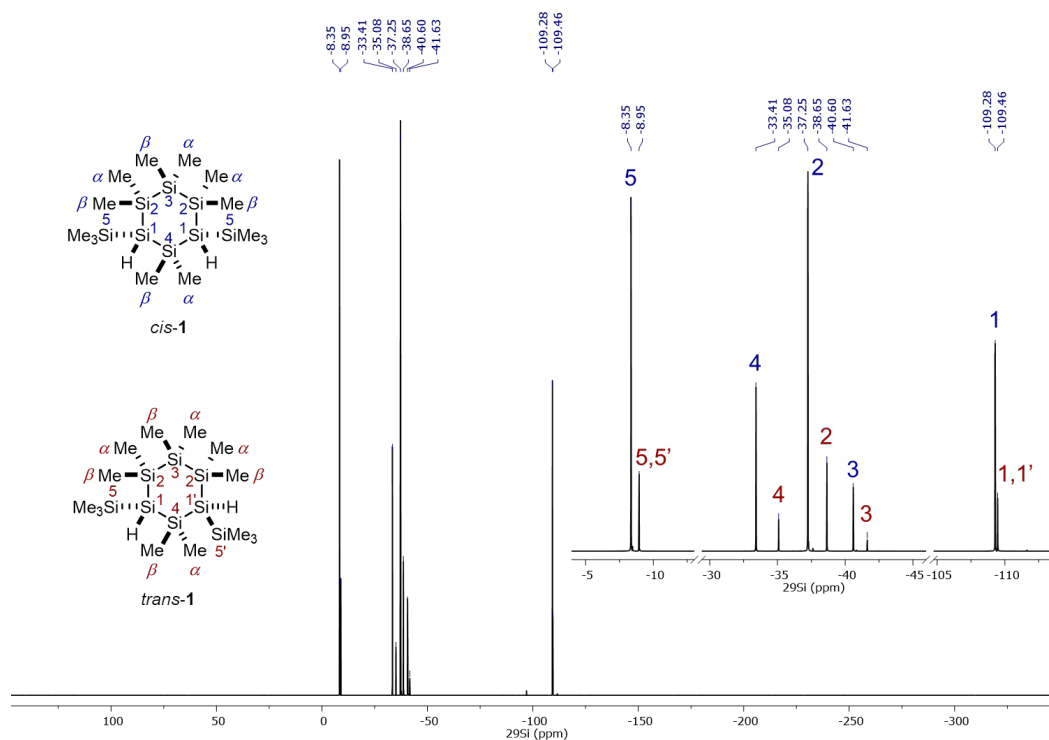

**Figure S-19.**  $^{29}\text{Si} \{^1\text{H}\}$  DEPT 45 NMR (79 MHz,  $\text{C}_6\text{D}_6$ ) spectrum of **1** (83:17 *cis:trans*). Inset shows assignments.

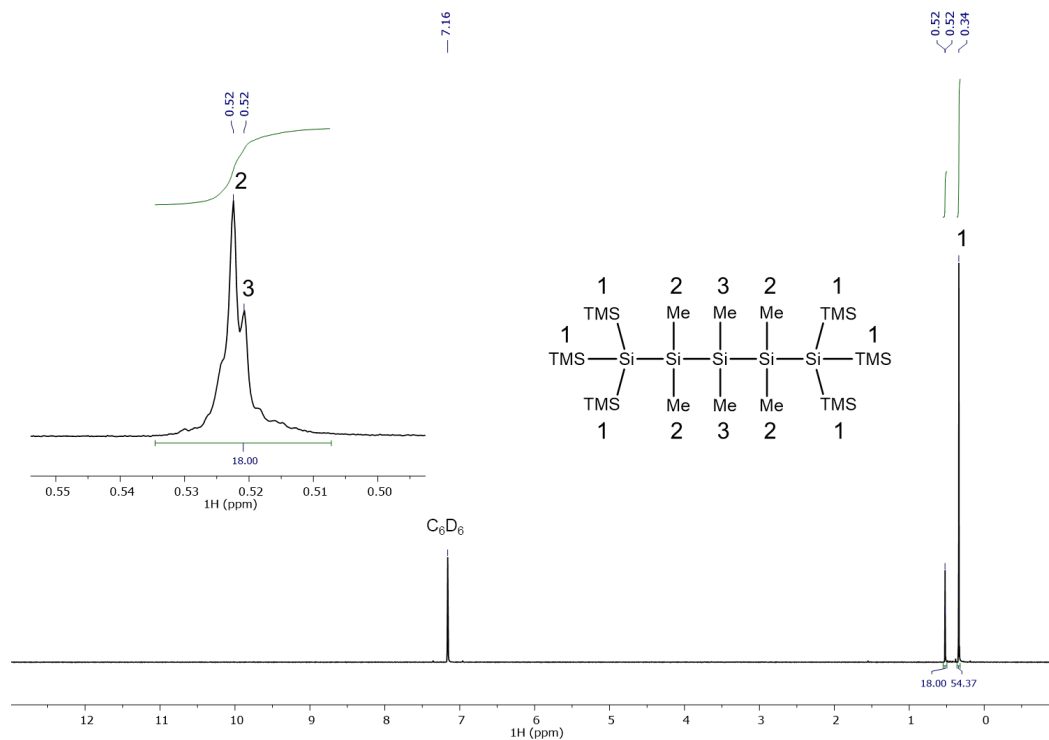

**Figure S-20.**  $^1\text{H}$  NMR (400 MHz,  $\text{C}_6\text{D}_6$ ) spectrum of **4**.

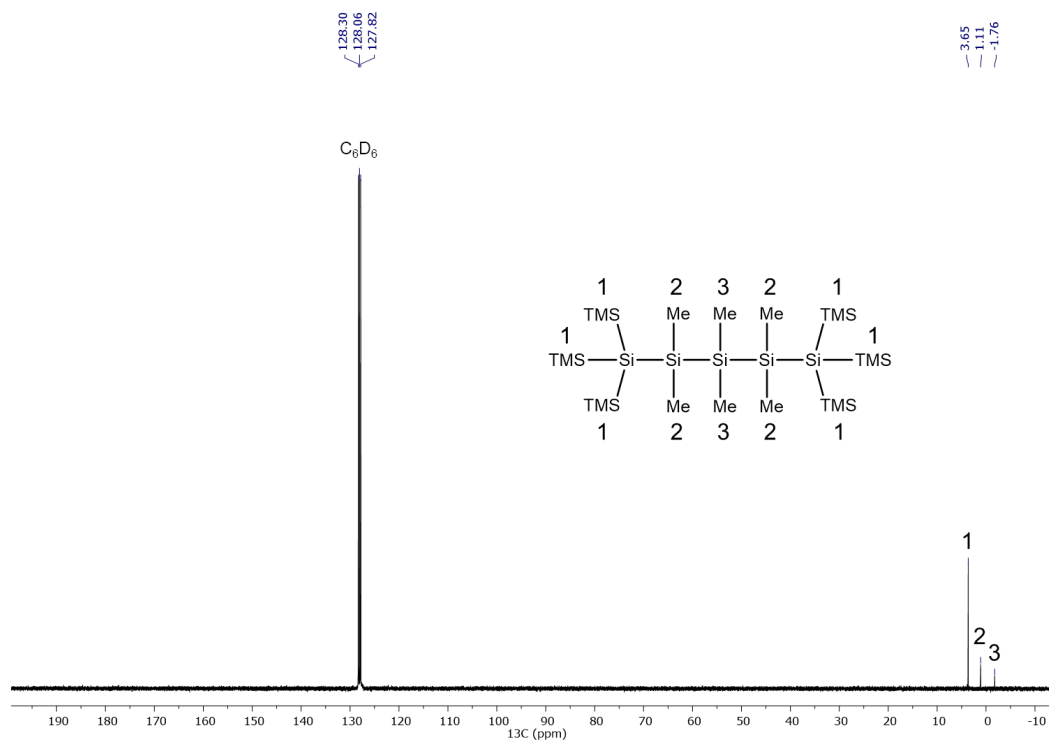

Figure S-21.  $^{13}\text{C}$   $\{^1\text{H}\}$  NMR (101 MHz,  $\text{C}_6\text{D}_6$ ) spectrum of **4**.

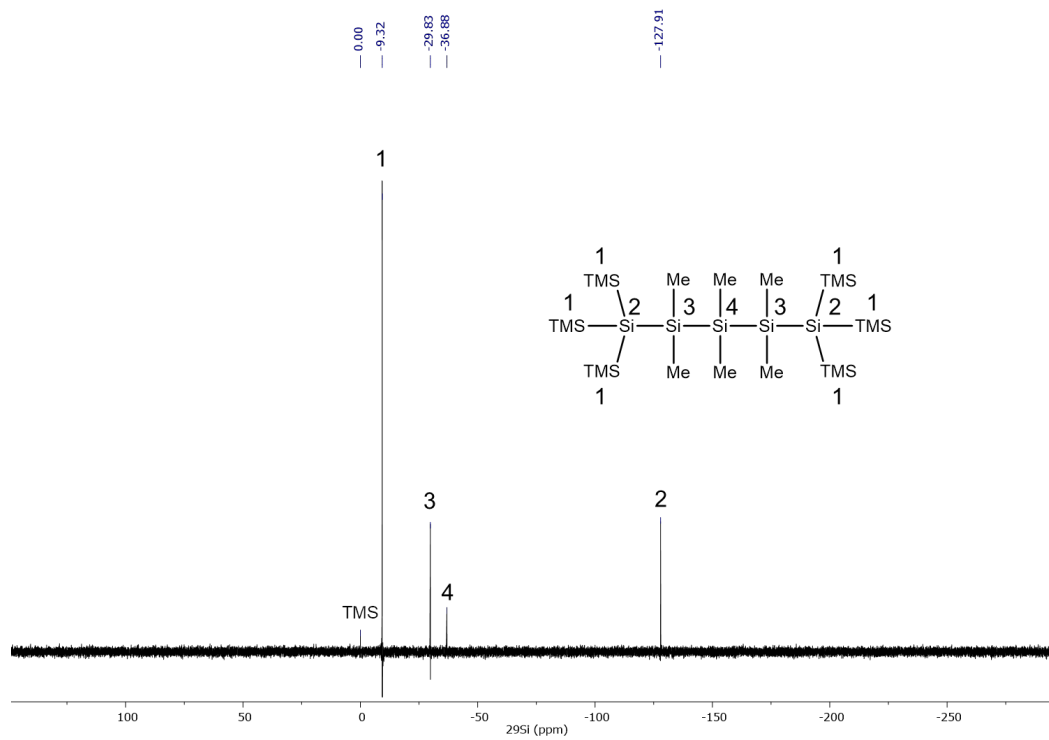

Figure S-22.  $^{29}\text{Si}$   $\{^1\text{H}\}$  DEPT 45 NMR spectrum (79 MHz,  $\text{C}_6\text{D}_6$ ) of **4**.

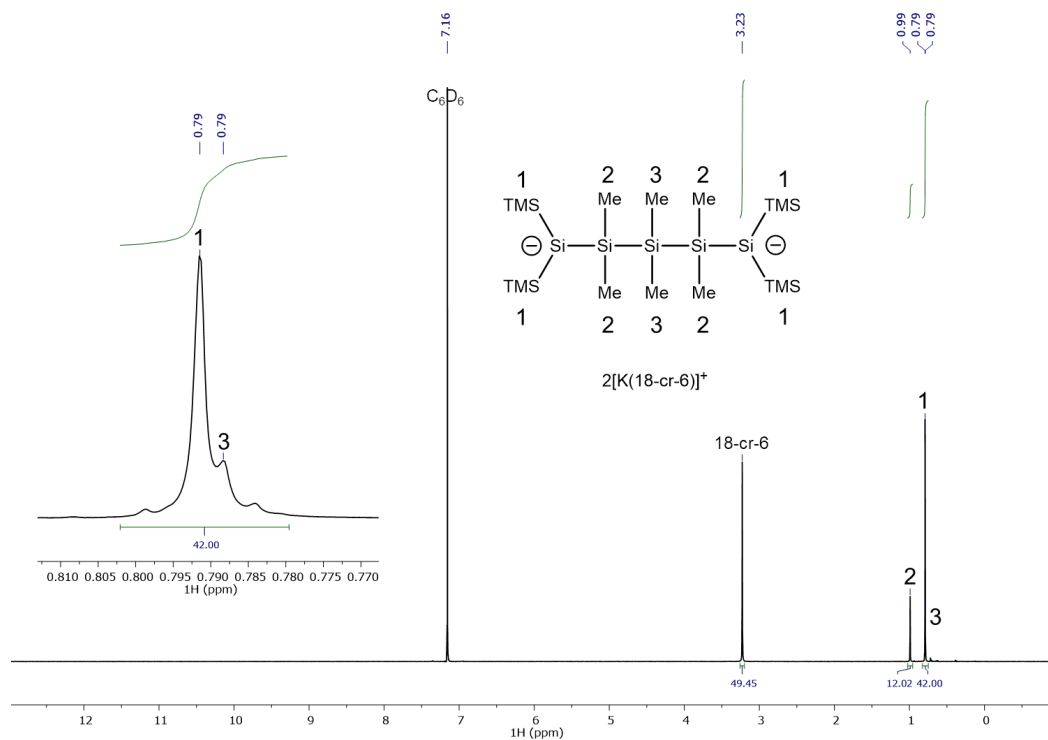

**Figure S-23.**  $^1\text{H}$  NMR spectrum (400 MHz,  $\text{C}_6\text{D}_6$ ) of  $5^{2-}\cdot 2[\text{K}(18\text{-cr-6})]^+$ .

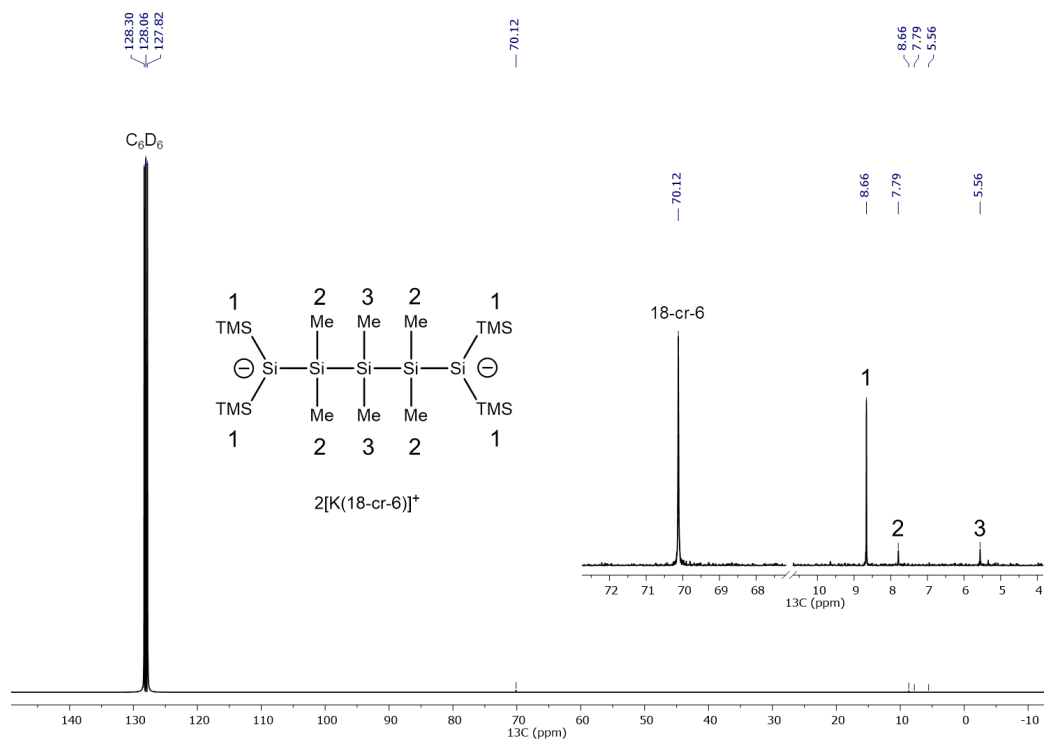

**Figure S-24.**  $^{13}\text{C}$   $\{^1\text{H}\}$  NMR spectrum (101 MHz,  $\text{C}_6\text{D}_6$ ) of  $5^{2-}\cdot 2[\text{K}(18\text{-cr-6})]^+$ .

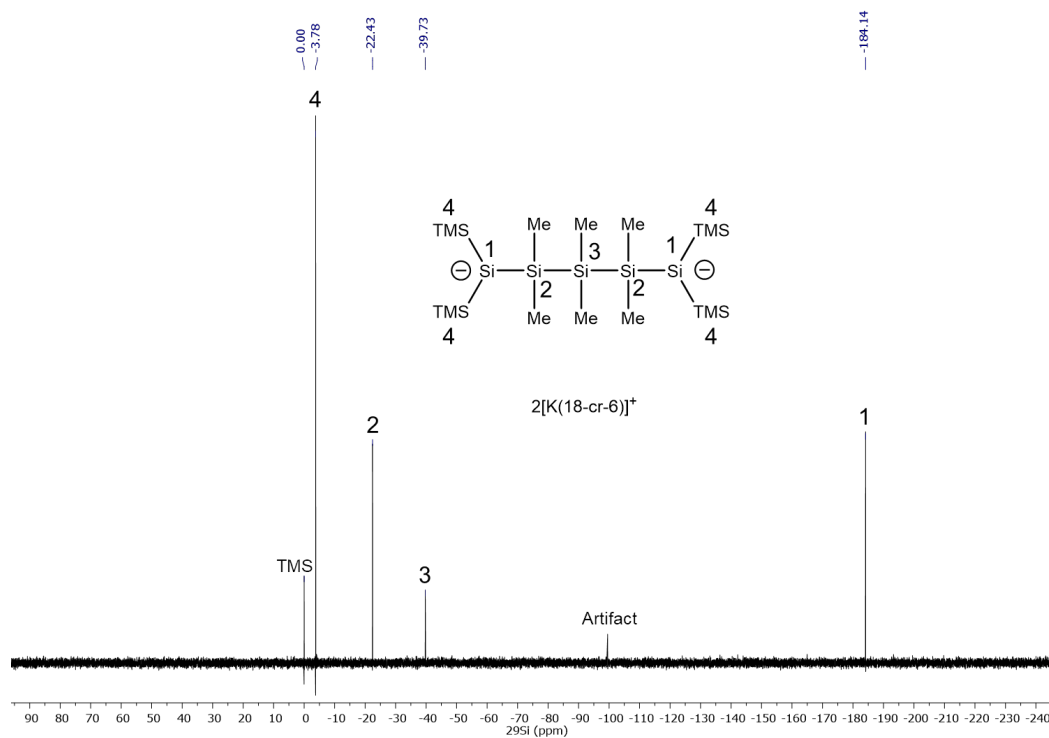

**Figure S-25.**  $^{29}\text{Si} \{^1\text{H}\}$  DEPT 45 NMR spectrum (79 MHz,  $\text{C}_6\text{D}_6$ ) of  $5^{2-} \cdot 2[\text{K}(18\text{-cr-6})]^+$ .

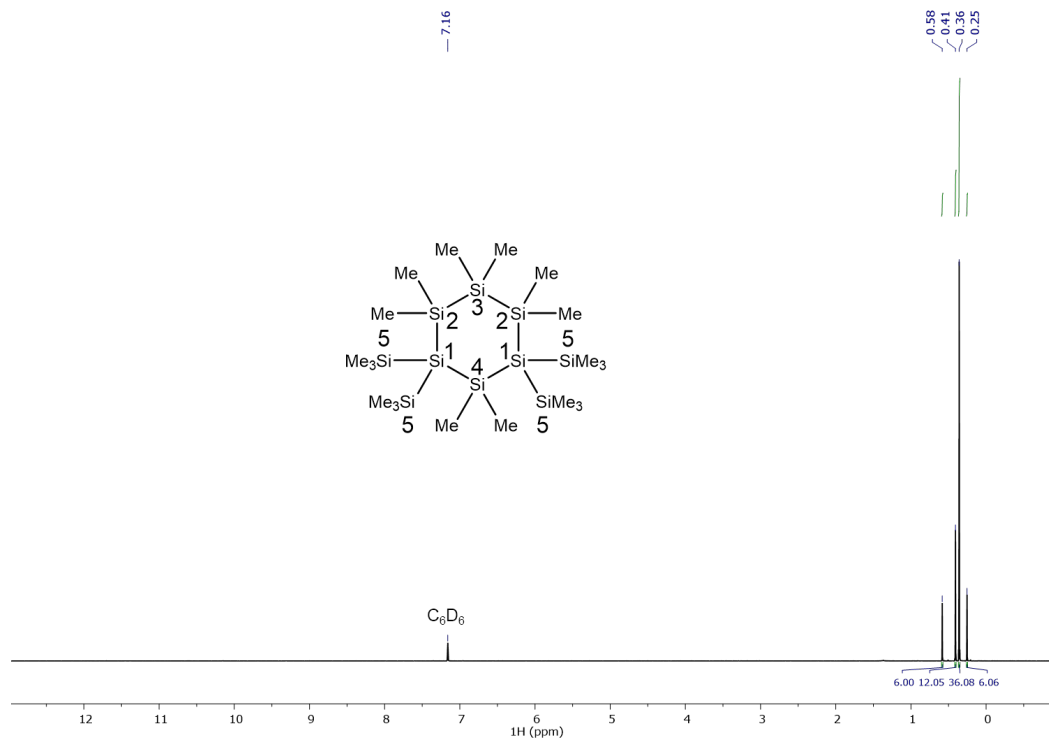

**Figure S-26.**  $^1\text{H}$  NMR (400 MHz,  $\text{C}_6\text{D}_6$ ) spectrum of **6**.

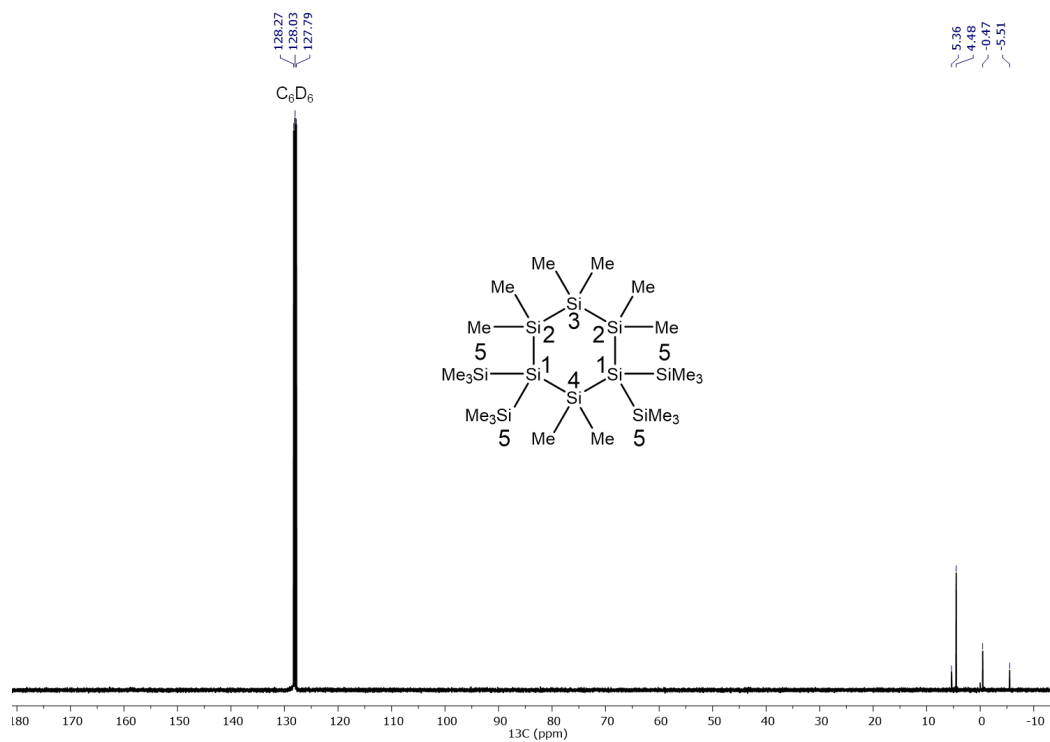

Figure S-27.  $^{13}\text{C}$   $\{^1\text{H}\}$  NMR (101 MHz,  $\text{C}_6\text{D}_6$ ) spectrum of **6**.

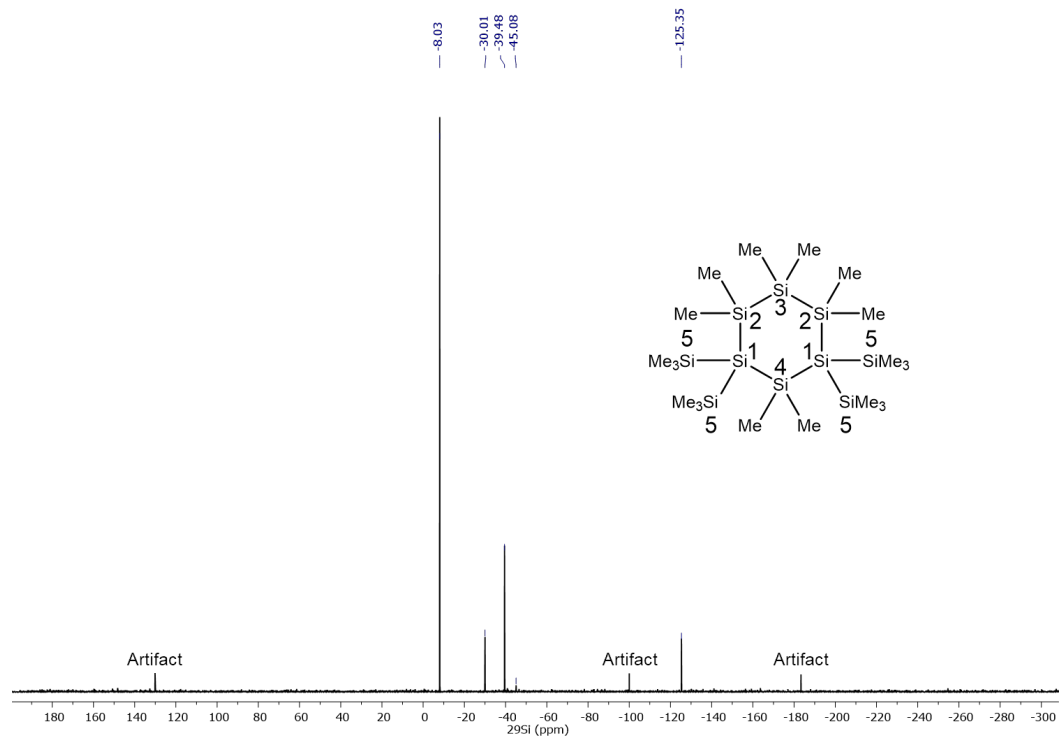

Figure S-28.  $^{29}\text{Si}$   $\{^1\text{H}\}$  DEPT 45 NMR (79 MHz,  $\text{C}_6\text{D}_6$ ) spectrum of **6**.



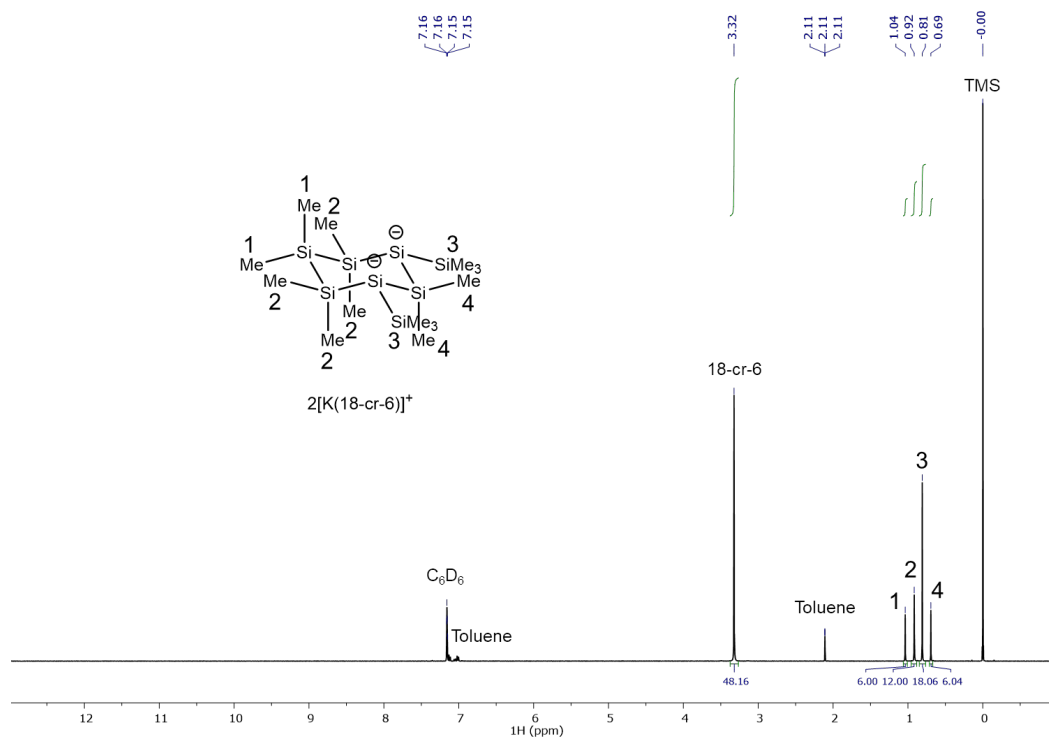

Figure S-29.  $^1\text{H}$  NMR (400 MHz,  $\text{C}_6\text{D}_6$ ) spectrum of 7.

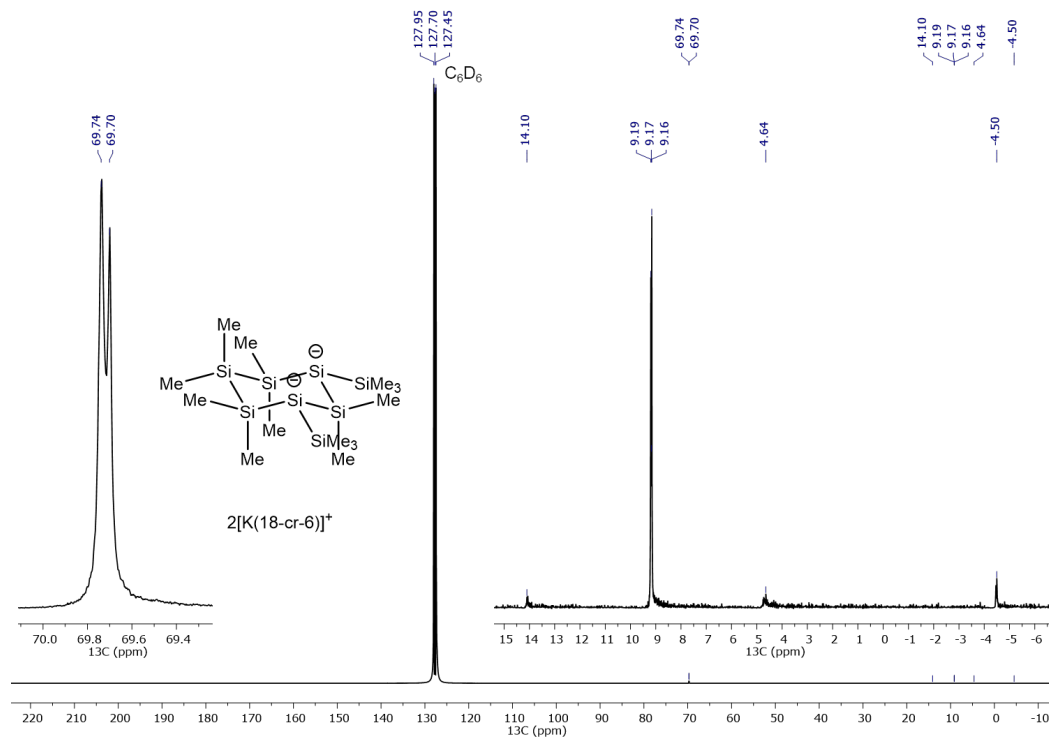

Figure S-30.  $^{13}\text{C}$   $\{^1\text{H}\}$  NMR (101 MHz,  $\text{C}_6\text{D}_6$ ) spectrum of 7.

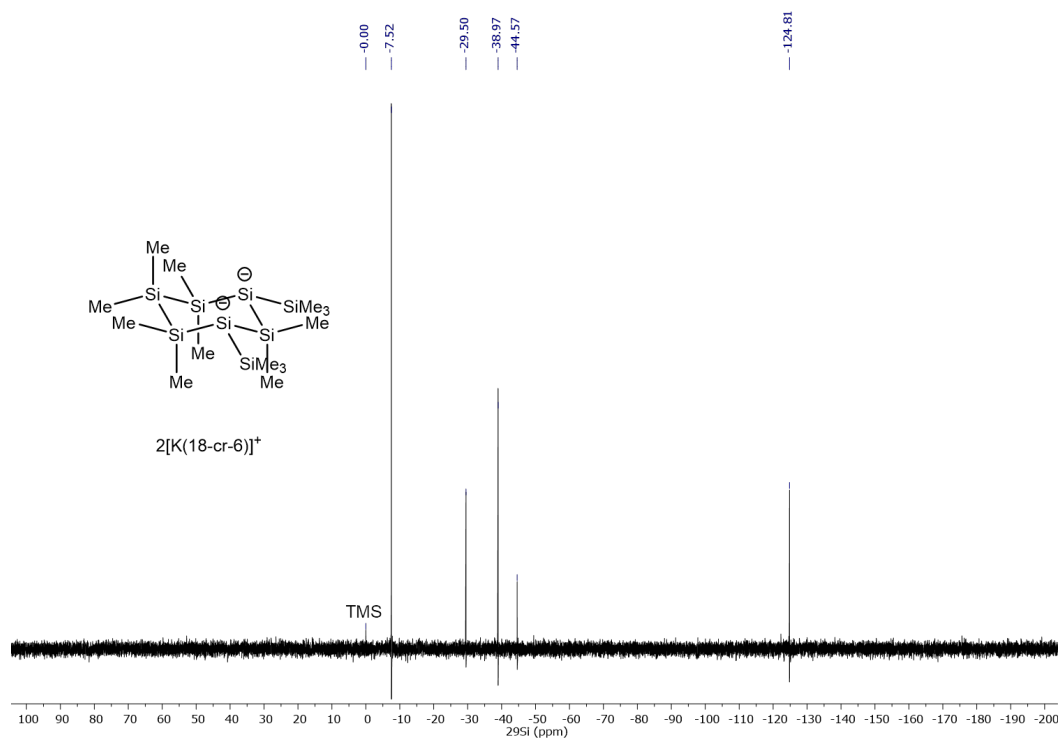

**Figure S-31.**  $^{29}\text{Si}$  { $^1\text{H}$ } DEPT 45 NMR (79 MHz,  $\text{C}_6\text{D}_6$ ) spectrum of **7**.

### 3. Single Crystal X-Ray Crystallographic Data

#### Single Crystal X-ray Crystallography

All reflection intensities were measured at 110(2) K for compounds **4** and **7**, at 130(2) K for compound **5**,\* and at 200(2) K for compound **6**.\*\* Data were collected using a SuperNova diffractometer (equipped with Atlas detector) either with Mo  $K\alpha$  radiation ( $\lambda = 0.71073 \text{ \AA}$ ) for **5**, **6** and **7** or with Cu  $K\alpha$  radiation ( $\lambda = 1.54178 \text{ \AA}$ ) for **4** under the program CrysAlisPro (Version CrysAlisPro 1.171.39.29c, Rigaku OD, 2017). The same program was used to refine the cell dimensions and for data reduction. The structure was solved with the program SHELXS-2014/7 or SHELXS-2018/3 (Sheldrick, 2015) and was refined on  $F^2$  with SHELXL-2014/7 or SHELXS-2018/3 (Sheldrick, 2015). For **4**, analytical numeric absorption correction using a multifaceted crystal model was applied using CrysAlisPro. For **5**, **6**, and **7**, numerical absorption correction based on gaussian integration over a multifaceted crystal model was applied using CrysAlisPro. The temperature of the data collection was controlled using the system Cryojet (manufactured by Oxford Instruments). The H atoms were placed at calculated positions using the instructions AFIX 23, AFIX 43 or AFIX 137 with isotropic displacement parameters having values 1.2 or 1.5  $U_{\text{eq}}$  of the attached C atoms.

\* At 110 K, the crystal that was mounted on the diffractometer appeared to suffer from significant crystal damage, and the diffraction pattern showed a significant amount of split reflections. At 130 K, another crystal remained single, and the diffraction pattern showed no split reflections. Crystals of compound **4** are air sensitive, and crystal damage occurs rapidly when exposed to air. In order to keep the integrity of the crystals prior mounting, crystals were promptly deposited on a microscope slide with Parabar 10312 oil (Paratone) under a cold  $\text{N}_2(\text{g})$  stream in order to minimize crystal decomposition prior mounting the crystal on the diffractometer.

\*\* Upon cooling to ca. 165 K, significantly crystal damage occurred, which is most likely due to a partially destructive solid-solid phase transition, and data were of poor quality. Upon cooling to 200 K, the crystals remained stable, and data could be collected from a single crystal.

#### Additional refinement details

**4:** The structure is ordered. The crystal that was mounted on the diffractometer was twinned, and the two twin components are related by a twofold rotational axis along the reciprocal axis  $\mathbf{c}^*$ . The structure refinement was carried out using the HKLF 5 instruction. The BASF scale factor refines to 0.1670(15). The  $R1 / wR2$  factors are relatively high because data integration was complex. In fact, it was difficult to find a data collection strategy that minimizes overlap between reflections found along the  $\mathbf{c}^*$  direction as the  $c$  dimension is very long (ca. 58  $\text{\AA}$ ). Furthermore, the crystals were all twinned as at least two (or more than two) thin plates were stacked on top of the other. Evidence of twinning is shown from the reciprocal lattice slices down  $\mathbf{a}^*$  and  $\mathbf{b}^*$ .

**5:** The structure is partly disordered. The two 18-crown-6 ligands, and one trimethylsilyl group are disordered over two orientations. The occupancy factors of the major components of the disorder refine to 0.9112(15), 0.745(3), and 0.64(3), respectively. The asymmetric unit also contains one disordered lattice toluene molecule, which is found near K1(18Crown6) (C7S' from the minor component of the disorder is found very near K1). The two orientations of the disorder are shown below (the occupancy factor of the major component of the disorder refines to 0.778(4)).

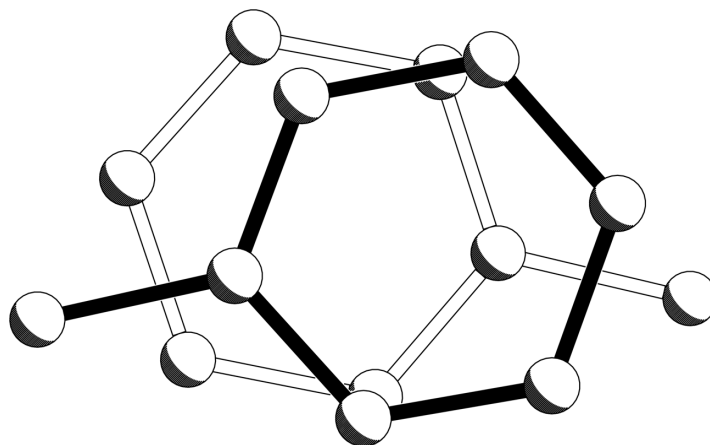

**6:** The structure is ordered.

**7:** The structure is partly disordered. The two 18C6 molecules are disordered over three orientations. All occupancy factors can be retrieved from the .cif file. The asymmetric unit also contains two lattice toluene solvent molecules. One solvent molecule is found at no special position, and is disordered over two orientations. The occupancy factor of the major component of the disorder refines to 0.826(4). The other solvent molecule is found at one site of inversion symmetry, and the occupancy factor is constrained to 0.5.

**Table S1. Crystallographic data for 4**

|                                                                                                                |                                                                                                                                                                                                                                                                                                                                                                                                              |
|----------------------------------------------------------------------------------------------------------------|--------------------------------------------------------------------------------------------------------------------------------------------------------------------------------------------------------------------------------------------------------------------------------------------------------------------------------------------------------------------------------------------------------------|
|                                                                                                                | <b>4</b>                                                                                                                                                                                                                                                                                                                                                                                                     |
| Crystal data                                                                                                   |                                                                                                                                                                                                                                                                                                                                                                                                              |
| Chemical formula                                                                                               | C <sub>24</sub> H <sub>72</sub> Si <sub>11</sub>                                                                                                                                                                                                                                                                                                                                                             |
| <i>M<sub>r</sub></i>                                                                                           | 669.80                                                                                                                                                                                                                                                                                                                                                                                                       |
| Crystal system, space group                                                                                    | Monoclinic, <i>C2/c</i>                                                                                                                                                                                                                                                                                                                                                                                      |
| Temperature (K)                                                                                                | 110                                                                                                                                                                                                                                                                                                                                                                                                          |
| <i>a</i> , <i>b</i> , <i>c</i> (Å)                                                                             | 15.5781 (3), 9.86896 (16), 57.967 (3)                                                                                                                                                                                                                                                                                                                                                                        |
| β (°)                                                                                                          | 96.152 (3)                                                                                                                                                                                                                                                                                                                                                                                                   |
| <i>V</i> (Å <sup>3</sup> )                                                                                     | 8860.5 (5)                                                                                                                                                                                                                                                                                                                                                                                                   |
| <i>Z</i>                                                                                                       | 8                                                                                                                                                                                                                                                                                                                                                                                                            |
| Radiation type                                                                                                 | Cu <i>K</i> α                                                                                                                                                                                                                                                                                                                                                                                                |
| μ (mm <sup>-1</sup> )                                                                                          | 3.15                                                                                                                                                                                                                                                                                                                                                                                                         |
| Crystal size (mm)                                                                                              | 0.35 × 0.18 × 0.03                                                                                                                                                                                                                                                                                                                                                                                           |
| Data collection                                                                                                |                                                                                                                                                                                                                                                                                                                                                                                                              |
| Diffractometer                                                                                                 | SuperNova, Dual, Cu at zero, Atlas                                                                                                                                                                                                                                                                                                                                                                           |
| Absorption correction                                                                                          | Analytical<br><i>CrysAlis PRO</i> 1.171.39.29c (Rigaku Oxford Diffraction, 2017) Analytical numeric absorption correction using a multifaceted crystal model based on expressions derived by R.C. Clark & J.S. Reid. (Clark, R. C. & Reid, J. S. (1995). <i>Acta Cryst.</i> A51, 887-897) Empirical absorption correction using spherical harmonics, implemented in <i>SCALE3 ABSPACK</i> scaling algorithm. |
| <i>T<sub>min</sub></i> , <i>T<sub>max</sub></i>                                                                | 0.507, 0.927                                                                                                                                                                                                                                                                                                                                                                                                 |
| No. of measured, independent and observed [ <i>I</i> > 2σ( <i>I</i> )] reflections                             | 28236, 7889, 7677                                                                                                                                                                                                                                                                                                                                                                                            |
| <i>R<sub>int</sub></i>                                                                                         | 0.049                                                                                                                                                                                                                                                                                                                                                                                                        |
| (sin θ/λ) <sub>max</sub> (Å <sup>-1</sup> )                                                                    | 0.598                                                                                                                                                                                                                                                                                                                                                                                                        |
| Refinement                                                                                                     |                                                                                                                                                                                                                                                                                                                                                                                                              |
| <i>R</i> [ <i>F</i> <sup>2</sup> > 2σ( <i>F</i> <sup>2</sup> )], <i>wR</i> ( <i>F</i> <sup>2</sup> ), <i>S</i> | 0.083, 0.197, 1.17                                                                                                                                                                                                                                                                                                                                                                                           |
| No. of reflections                                                                                             | 7889                                                                                                                                                                                                                                                                                                                                                                                                         |
| No. of parameters                                                                                              | 341                                                                                                                                                                                                                                                                                                                                                                                                          |
| H-atom treatment                                                                                               | H-atom parameters constrained                                                                                                                                                                                                                                                                                                                                                                                |
|                                                                                                                | $w = 1/[\sigma^2(F_o^2) + (0.0325P)^2 + 151.7173P]$<br>where $P = (F_o^2 + 2F_c^2)/3$                                                                                                                                                                                                                                                                                                                        |
| Δρ <sub>max</sub> , Δρ <sub>min</sub> (e Å <sup>-3</sup> )                                                     | 0.54, -0.58                                                                                                                                                                                                                                                                                                                                                                                                  |

**Table S2. Crystallographic data for 5**

|                                                                                                                   |                                                                                                                                                                                                                                                                                            |
|-------------------------------------------------------------------------------------------------------------------|--------------------------------------------------------------------------------------------------------------------------------------------------------------------------------------------------------------------------------------------------------------------------------------------|
|                                                                                                                   | <b>5</b>                                                                                                                                                                                                                                                                                   |
| Crystal data                                                                                                      |                                                                                                                                                                                                                                                                                            |
| Chemical formula                                                                                                  | C <sub>42</sub> H <sub>102</sub> K <sub>2</sub> O <sub>12</sub> Si <sub>9</sub> ·C <sub>7</sub> H <sub>8</sub>                                                                                                                                                                             |
| <i>M<sub>r</sub></i>                                                                                              | 1222.37                                                                                                                                                                                                                                                                                    |
| Crystal system,<br>space group                                                                                    | Triclinic, <i>P</i> -1                                                                                                                                                                                                                                                                     |
| Temperature (K)                                                                                                   | 130                                                                                                                                                                                                                                                                                        |
| <i>a</i> , <i>b</i> , <i>c</i> (Å)                                                                                | 12.2789 (3), 16.4703 (3), 19.5884 (4)                                                                                                                                                                                                                                                      |
| α, β, γ (°)                                                                                                       | 74.5249 (19), 73.536 (2), 87.0261 (18)                                                                                                                                                                                                                                                     |
| <i>V</i> (Å <sup>3</sup> )                                                                                        | 3660.14 (14)                                                                                                                                                                                                                                                                               |
| <i>Z</i>                                                                                                          | 2                                                                                                                                                                                                                                                                                          |
| Radiation type                                                                                                    | Mo <i>K</i> α                                                                                                                                                                                                                                                                              |
| μ (mm <sup>-1</sup> )                                                                                             | 0.32                                                                                                                                                                                                                                                                                       |
| Crystal size (mm)                                                                                                 | 0.59 × 0.31 × 0.20                                                                                                                                                                                                                                                                         |
| Data collection                                                                                                   |                                                                                                                                                                                                                                                                                            |
| Diffractometer                                                                                                    | SuperNova, Dual, Cu at zero, Atlas                                                                                                                                                                                                                                                         |
| Absorption<br>correction                                                                                          | Gaussian<br><i>CrysAlis PRO</i> 1.171.39.29c (Rigaku Oxford Diffraction, 2017) Numerical absorption correction based on gaussian integration over a multifaceted crystal model Empirical absorption correction using spherical harmonics, implemented in SCALE3 ABSPACK scaling algorithm. |
| <i>T</i> <sub>min</sub> , <i>T</i> <sub>max</sub>                                                                 | 0.415, 1.000                                                                                                                                                                                                                                                                               |
| No. of measured,<br>independent and<br>observed [ <i>I</i> ><br>2σ( <i>I</i> )] reflections                       | 73016, 16817, 13516                                                                                                                                                                                                                                                                        |
| <i>R</i> <sub>int</sub>                                                                                           | 0.035                                                                                                                                                                                                                                                                                      |
| (sin θ/λ) <sub>max</sub> (Å <sup>-1</sup> )                                                                       | 0.650                                                                                                                                                                                                                                                                                      |
| Refinement                                                                                                        |                                                                                                                                                                                                                                                                                            |
| <i>R</i> [ <i>F</i> <sup>2</sup> > 2σ( <i>F</i> <sup>2</sup> )],<br><i>wR</i> ( <i>F</i> <sup>2</sup> ), <i>S</i> | 0.046, 0.115, 1.06                                                                                                                                                                                                                                                                         |
| No. of reflections                                                                                                | 16817                                                                                                                                                                                                                                                                                      |
| No. of parameters                                                                                                 | 1089                                                                                                                                                                                                                                                                                       |
| No. of restraints                                                                                                 | 1928                                                                                                                                                                                                                                                                                       |
| H-atom treatment                                                                                                  | H-atom parameters constrained                                                                                                                                                                                                                                                              |
| Δρ <sub>max</sub> , Δρ <sub>min</sub> (e Å <sup>-3</sup> )                                                        | 0.60, -0.34                                                                                                                                                                                                                                                                                |

**Table S3. Crystallographic data for 6**

|                                                                                                                |                                                                                                                                                                                                                                                                                            |
|----------------------------------------------------------------------------------------------------------------|--------------------------------------------------------------------------------------------------------------------------------------------------------------------------------------------------------------------------------------------------------------------------------------------|
|                                                                                                                | <b>6</b>                                                                                                                                                                                                                                                                                   |
| Crystal data                                                                                                   |                                                                                                                                                                                                                                                                                            |
| Chemical formula                                                                                               | C <sub>20</sub> H <sub>60</sub> Si <sub>10</sub>                                                                                                                                                                                                                                           |
| <i>M<sub>r</sub></i>                                                                                           | 581.58                                                                                                                                                                                                                                                                                     |
| Crystal system, space group                                                                                    | Triclinic, <i>P</i> -1                                                                                                                                                                                                                                                                     |
| Temperature (K)                                                                                                | 200                                                                                                                                                                                                                                                                                        |
| <i>a</i> , <i>b</i> , <i>c</i> (Å)                                                                             | 10.1167 (3), 12.4290 (3), 17.0543 (4)                                                                                                                                                                                                                                                      |
| α, β, γ (°)                                                                                                    | 71.232 (2), 80.544 (2), 69.194 (3)                                                                                                                                                                                                                                                         |
| <i>V</i> (Å <sup>3</sup> )                                                                                     | 1894.96 (10)                                                                                                                                                                                                                                                                               |
| <i>Z</i>                                                                                                       | 2                                                                                                                                                                                                                                                                                          |
| Radiation type                                                                                                 | Mo <i>K</i> α                                                                                                                                                                                                                                                                              |
| μ (mm <sup>-1</sup> )                                                                                          | 0.36                                                                                                                                                                                                                                                                                       |
| Crystal size (mm)                                                                                              | 0.41 × 0.26 × 0.08                                                                                                                                                                                                                                                                         |
| Data collection                                                                                                |                                                                                                                                                                                                                                                                                            |
| Diffractometer                                                                                                 | SuperNova, Dual, Cu at zero, Atlas                                                                                                                                                                                                                                                         |
| Absorption correction                                                                                          | Gaussian<br><i>CrysAlis PRO</i> 1.171.39.29c (Rigaku Oxford Diffraction, 2017) Numerical absorption correction based on gaussian integration over a multifaceted crystal model Empirical absorption correction using spherical harmonics, implemented in SCALE3 ABSPACK scaling algorithm. |
| <i>T<sub>min</sub></i> , <i>T<sub>max</sub></i>                                                                | 0.370, 1.000                                                                                                                                                                                                                                                                               |
| No. of measured, independent and observed [ <i>I</i> > 2σ( <i>I</i> )] reflections                             | 36920, 8701, 7386                                                                                                                                                                                                                                                                          |
| <i>R<sub>int</sub></i>                                                                                         | 0.026                                                                                                                                                                                                                                                                                      |
| (sin θ/λ) <sub>max</sub> (Å <sup>-1</sup> )                                                                    | 0.650                                                                                                                                                                                                                                                                                      |
| Refinement                                                                                                     |                                                                                                                                                                                                                                                                                            |
| <i>R</i> [ <i>F</i> <sup>2</sup> > 2σ( <i>F</i> <sup>2</sup> )], <i>wR</i> ( <i>F</i> <sup>2</sup> ), <i>S</i> | 0.029, 0.077, 1.06                                                                                                                                                                                                                                                                         |
| No. of reflections                                                                                             | 8701                                                                                                                                                                                                                                                                                       |
| No. of parameters                                                                                              | 291                                                                                                                                                                                                                                                                                        |
| H-atom treatment                                                                                               | H-atom parameters constrained                                                                                                                                                                                                                                                              |
| Δρ <sub>max</sub> , Δρ <sub>min</sub> (e Å <sup>-3</sup> )                                                     | 0.33, -0.27                                                                                                                                                                                                                                                                                |

**Table S4. Crystallographic data for 7**

|                                                                                                                |                                                                                                                                                                                                                                                                                            |
|----------------------------------------------------------------------------------------------------------------|--------------------------------------------------------------------------------------------------------------------------------------------------------------------------------------------------------------------------------------------------------------------------------------------|
|                                                                                                                | 7                                                                                                                                                                                                                                                                                          |
| Crystal data                                                                                                   |                                                                                                                                                                                                                                                                                            |
| Chemical formula                                                                                               | C <sub>97</sub> H <sub>204</sub> K <sub>4</sub> O <sub>24</sub> Si <sub>16</sub>                                                                                                                                                                                                           |
| <i>M</i> <sub>r</sub>                                                                                          | 2360.43                                                                                                                                                                                                                                                                                    |
| Crystal system, space group                                                                                    | Monoclinic, <i>P2<sub>1</sub>/n</i>                                                                                                                                                                                                                                                        |
| Temperature (K)                                                                                                | 110                                                                                                                                                                                                                                                                                        |
| <i>a</i> , <i>b</i> , <i>c</i> (Å)                                                                             | 13.3319 (3), 21.5603 (5), 23.7767 (6)                                                                                                                                                                                                                                                      |
| β (°)                                                                                                          | 99.786 (2)                                                                                                                                                                                                                                                                                 |
| <i>V</i> (Å <sup>3</sup> )                                                                                     | 6734.9 (3)                                                                                                                                                                                                                                                                                 |
| <i>Z</i>                                                                                                       | 2                                                                                                                                                                                                                                                                                          |
| Radiation type                                                                                                 | Mo <i>K</i> α                                                                                                                                                                                                                                                                              |
| μ (mm <sup>-1</sup> )                                                                                          | 0.33                                                                                                                                                                                                                                                                                       |
| Crystal size (mm)                                                                                              | 0.46 × 0.20 × 0.09                                                                                                                                                                                                                                                                         |
| Data collection                                                                                                |                                                                                                                                                                                                                                                                                            |
| Diffractometer                                                                                                 | SuperNova, Dual, Cu at zero, Atlas                                                                                                                                                                                                                                                         |
| Absorption correction                                                                                          | Gaussian<br><i>CrysAlis PRO</i> 1.171.39.29c (Rigaku Oxford Diffraction, 2017) Numerical absorption correction based on gaussian integration over a multifaceted crystal model Empirical absorption correction using spherical harmonics, implemented in SCALE3 ABSPACK scaling algorithm. |
| <i>T</i> <sub>min</sub> , <i>T</i> <sub>max</sub>                                                              | 0.425, 1.000                                                                                                                                                                                                                                                                               |
| No. of measured, independent and observed [ <i>I</i> > 2σ( <i>I</i> )] reflections                             | 101881, 15458, 12767                                                                                                                                                                                                                                                                       |
| <i>R</i> <sub>int</sub>                                                                                        | 0.043                                                                                                                                                                                                                                                                                      |
| (sin θ/λ) <sub>max</sub> (Å <sup>-1</sup> )                                                                    | 0.650                                                                                                                                                                                                                                                                                      |
| Refinement                                                                                                     |                                                                                                                                                                                                                                                                                            |
| <i>R</i> [ <i>F</i> <sup>2</sup> > 2σ( <i>F</i> <sup>2</sup> )], <i>wR</i> ( <i>F</i> <sup>2</sup> ), <i>S</i> | 0.050, 0.110, 1.07                                                                                                                                                                                                                                                                         |
| No. of reflections                                                                                             | 15458                                                                                                                                                                                                                                                                                      |
| No. of parameters                                                                                              | 1366                                                                                                                                                                                                                                                                                       |
| No. of restraints                                                                                              | 3528                                                                                                                                                                                                                                                                                       |
| H-atom treatment                                                                                               | H-atom parameters constrained                                                                                                                                                                                                                                                              |
| Δρ <sub>max</sub> , Δρ <sub>min</sub> (e Å <sup>-3</sup> )                                                     | 1.00, -0.72                                                                                                                                                                                                                                                                                |



Computer programs: *CrysAlis PRO* 1.171.39.29c (Rigaku OD, 2017), *SHELXS2018/3* (Sheldrick, 2018), *SHELXL2018/3* (Sheldrick, 2018), *SHELXTL* v6.10 (Sheldrick, 2008).

#### 4. References

- 1 R. Fischer, T. Konopa, S. Ullly, J. Baumgartner and C. Marschner, *J. Organomet. Chem.*, 2003, **685**, 79–92.
- 2 G. Sheldrick, *Acta. Cryst.*, 2015, **C71**, 3-8.
